# Supplementary material for: Thermal Mapping of Self-Promoted Calcium Carbide Reactions for Performing Energy-Economic Processes
Source: MDPI journal article supplement (doi:10.3390/ijms23052763), 2022-03-02
Supplement: s1 [file s1]

Supporting Information

for the article

# **Thermal Mapping of Self-Promoted Calcium Carbide Reactions for Performing Energy-Economic Processes**

Konstantin S. Rodygin,<sup>a</sup> Kristina A. Lotsman,<sup>a</sup> Kirill S. Erokhin,<sup>b</sup> Viktoria A. Korabelnikova,<sup>b</sup> Valentine P. Ananikov<sup>\*a,b</sup>

<sup>a</sup> Institute of Chemistry, Saint Petersburg State University, Universitetskiy pr. 26, Stary Petergof 198504, Russia.

<sup>b</sup> Zelinsky Institute of Organic Chemistry, Russian Academy of Sciences, Leninsky pr. 47, Moscow 119991, Russia. E-mail: val@ioc.ac.ru

## Contents

|                                                                              |     |
|------------------------------------------------------------------------------|-----|
| 1. Design of the liner.....                                                  | S3  |
| 2. Blank experiments with calcium hydroxide .....                            | S5  |
| 3. Blank experiments in the absence of calcium carbide .....                 | S6  |
| 4. Blank experiments with DMSO/water mixture in the absence of reagents..... | S7  |
| 5. Statistical processing of the results .....                               | S8  |
| 6. NMR data .....                                                            | S44 |
| 7. Reaction setup.....                                                       | S45 |
| 8. Monitoring of the heating with a thermocouple .....                       | S46 |

## 1. Design of the liner

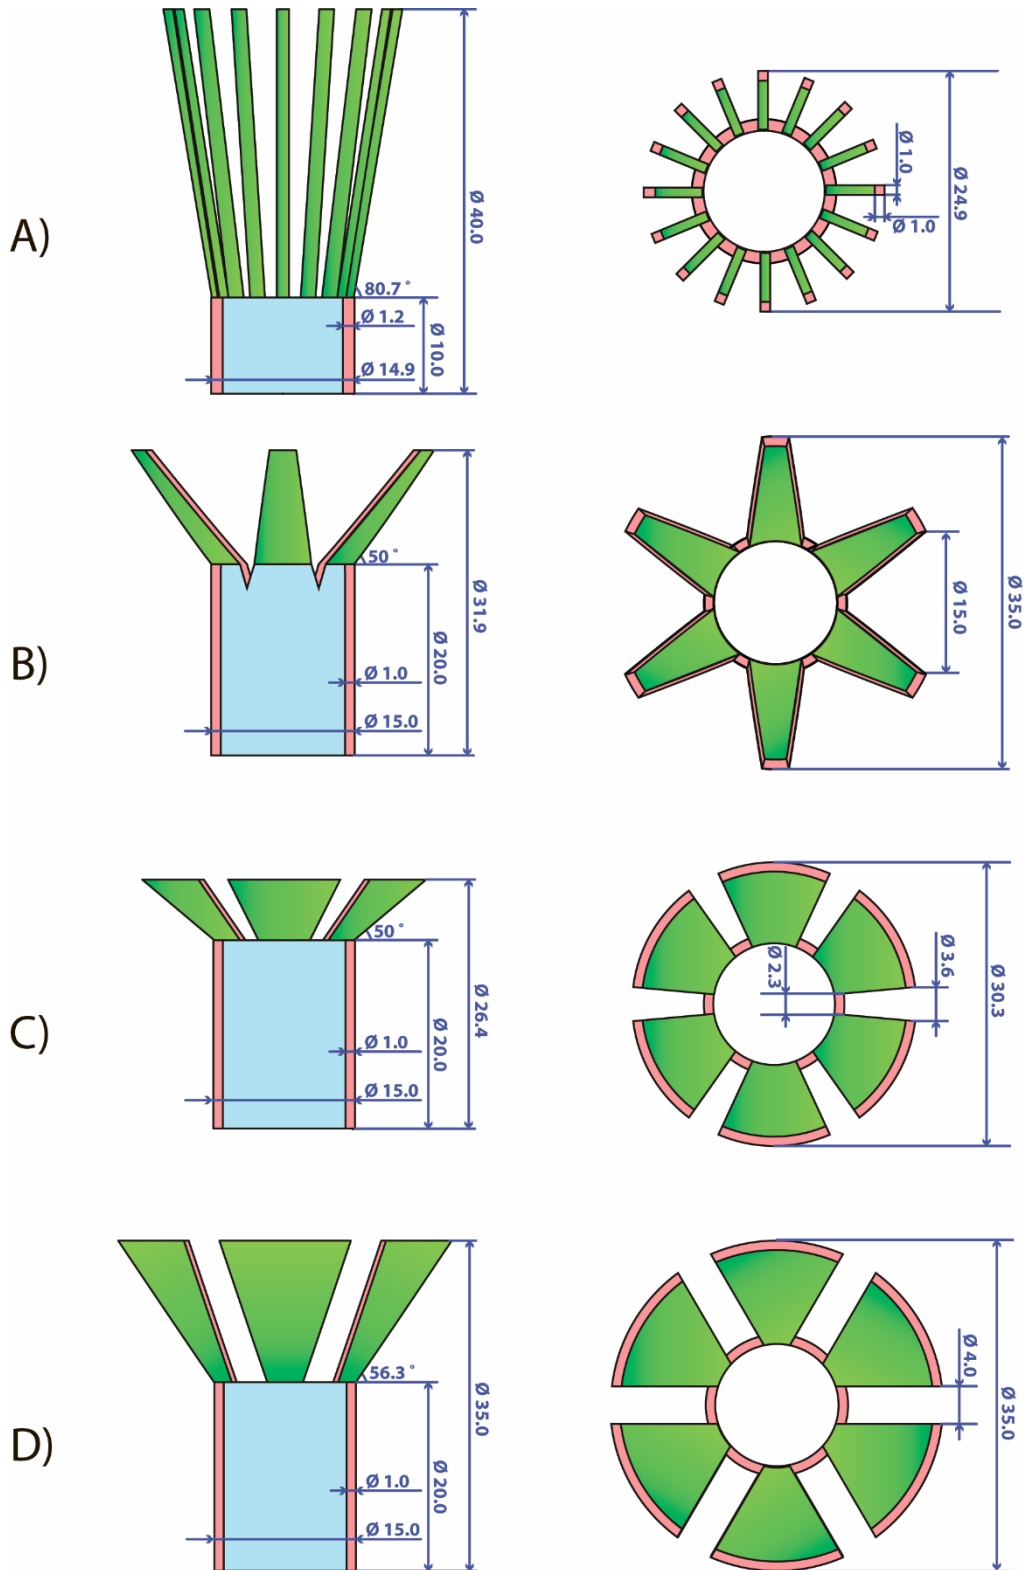

Figure S1: Variety of analysed liners.

The liner consists of two main parts: an inner tube retainer and a position retainer. The inner tube retainer is a hollow cylinder, the inner diameter of which is determined by the outer diameter of the inner tube. Position retainer is a set of “petals”. The strength of tube-in-tube fixation depends on the contact area and pressure force of the petals,

which are determined by the size of the petals and the angle between them and the hollow cylinder. The performance of a variety of 3D printed liners was analyzed. In the case of small petals and a high angle (Fig. S1A), the liner was unable to fix the position of the tube, so the tube fell immediately. Decreasing the angle slightly improved the performance (Fig. S1B, C), resulting in short-term fixation. Although, the inner tube fell too. Increasing the length of the petals with a simultaneous increase in the outer diameter at the end point and contact area led to the creation of a liner that allowed the tube to be fixed throughout the experiment (Fig. S1D).

**3D-printing options.** The liner was printed using a Solo Master 3D printer equipped with a 0.4 mm nozzle. A commercially available nylon filament (Best Filament trade mark) with a 1.75 mm diameter was used. The options were as follows:

- Layer height: 0.1 mm
- Extrusion width: 0.4 mm
- Temperature of nozzle: 230 °C
- Extrusion multiplier: 1.00
- Z-offset: 0.00

## 2. Blank experiments with calcium hydroxide

Calcium hydroxide formed after calcium carbide hydrolysis. The solvation of the hydroxide by a solvent is possible. To examine the effect of calcium hydroxide solvation, the temperature profile of  $\text{Ca}(\text{OH})_2$  with various solvents was recorded. The profiles of the mixing were the same as in the case of blank experiments with water in the absence of any additives. Thus, the increasing of temperature was caused by mixing water with a solvent but not by solvation of calcium hydroxide.

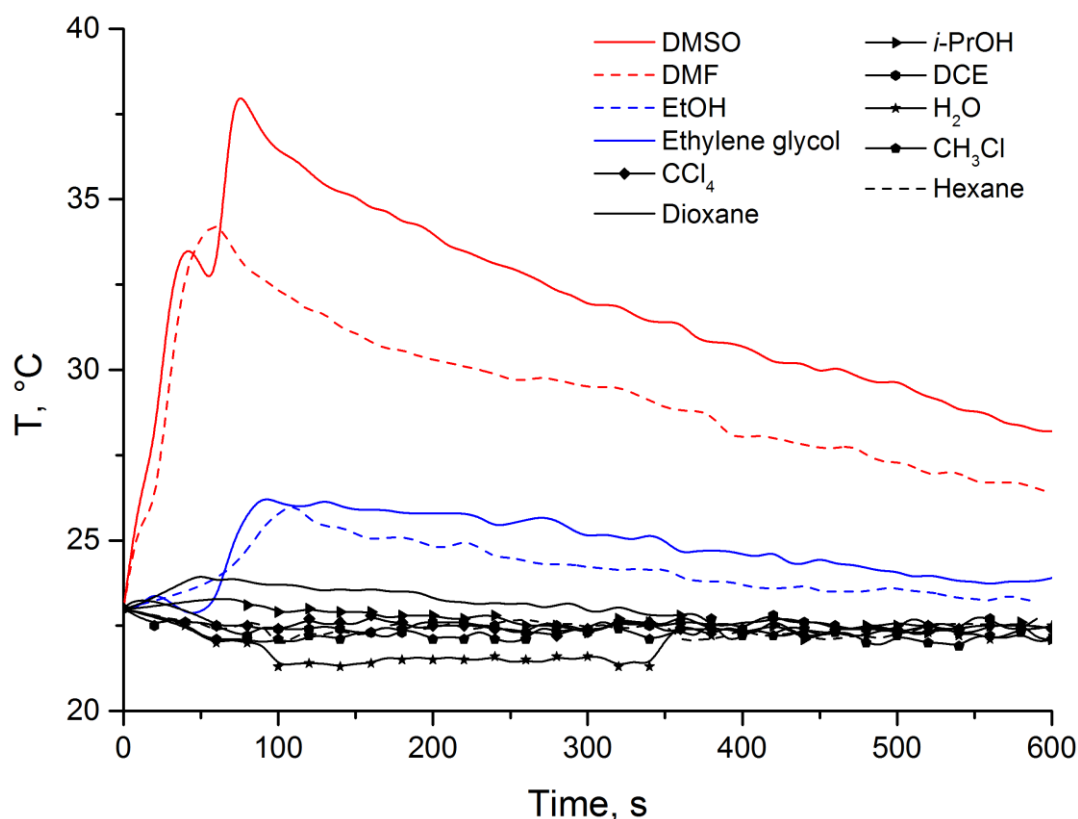

Figure S2: Heat generation in a tube-in-tube reactor with calcium hydroxide (the observed temperature change was due to mixing DMSO and water, see Sections 3, 4).

### 3. Blank experiments in the absence of calcium carbide

Solvents may form hydrogen bonds with water when mixed. Blank experiments were carried out to measure heating in the absence of calcium carbide and calcium hydroxide. As a result, the increasing of temperature was caused by mixing water and a solvent.

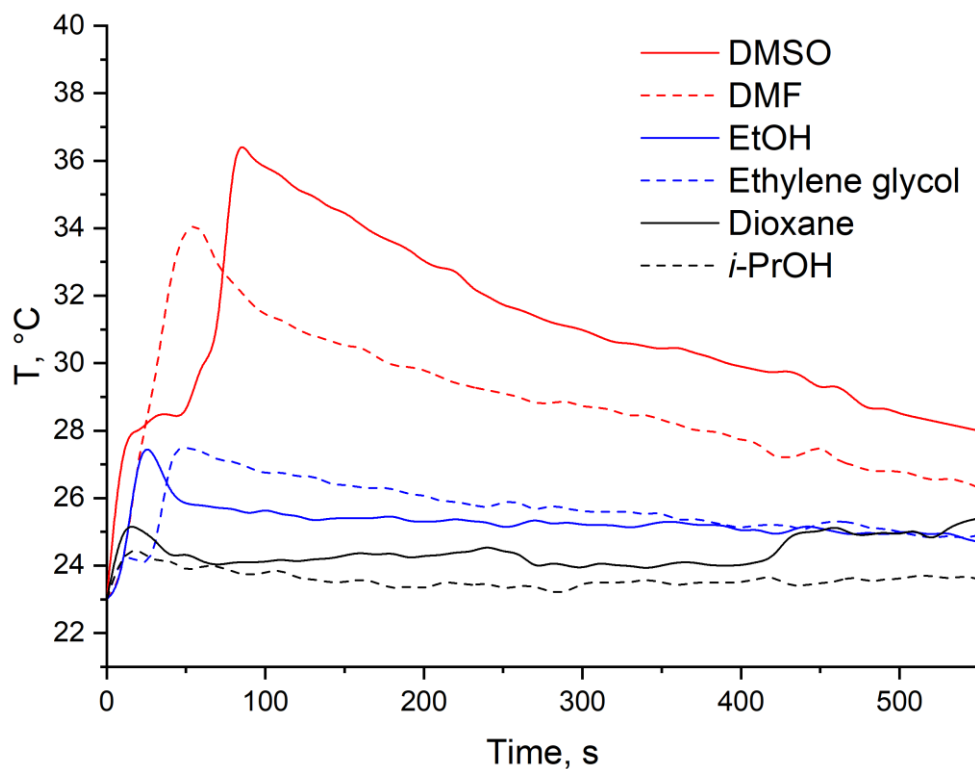

Figure S3: Heat generation in a tube-in-tube reactor in the absence of calcium carbide and calcium hydroxide.

#### 4. Blank experiments with DMSO/water mixture in the absence of reagents

A reaction tube was charged with DMSO (standard amount). A thermometer was placed right into the solvent. The starting temperature was 24 °C. Then, an appropriate amount of water was dropped into the solvent, and stirring was initiated (500 rpm). The temperature increased to 43 °C (the maximum) and started to decrease. After 10 minutes, the temperature was 34 °C.

## 5. Statistical processing of the results

To ensure in the accuracy of the measurements statistical processing was carried out.

$$D(T) - S_m^2$$

S – standard deviation of data series  $m$

$$G = \max D(T) / \sum D(T)$$

The temperature profile of the reaction was depended on the starting time of stirring after the addition of water. Therefore, the starting time of stirring was varied from 0 seconds (right after the addition water the stirring was turned on) to 60 seconds.

Then, the other conditions were varied (type of solvent, loadings, water/solvent ratio).

All the experiments were carried out using a standard procedure (please, see section 3.2. General Procedures in the Manuscript).

Table S1: Time variation, 0 s.

| 0 s     |                     |                     |                     |                       |      |
|---------|---------------------|---------------------|---------------------|-----------------------|------|
| Time, s | T <sub>1</sub> , °C | T <sub>2</sub> , °C | T <sub>3</sub> , °C | T <sub>med</sub> , °C | D(T) |
| 0       | 23.0                | 23.0                | 23.0                | 23.0                  | 0.00 |
| 10      | 41.4                | 39.4                | 42.3                | 41.0                  | 2.20 |
| 20      | 42.0                | 43.5                | 43.3                | 42.9                  | 0.66 |
| 30      | 42.5                | 43.5                | 43.9                | 43.3                  | 0.52 |
| 40      | 43.8                | 44.4                | 44.9                | 44.4                  | 0.30 |
| 50      | 44.7                | 45.2                | 45.7                | 45.2                  | 0.25 |
| 60      | 45.9                | 46.1                | 46.3                | 46.1                  | 0.04 |
| 70      | 46.6                | 47.1                | 46.8                | 46.8                  | 0.06 |
| 80      | 47.5                | 47.8                | 47.2                | 47.5                  | 0.09 |
| 90      | 47.9                | 48.5                | 47.6                | 48.0                  | 0.21 |
| 100     | 48.5                | 48.6                | 47.7                | 48.3                  | 0.24 |
| 110     | 48.8                | 49.0                | 48.0                | 48.6                  | 0.28 |
| 120     | 48.7                | 49.1                | 48.1                | 48.6                  | 0.25 |
| 130     | 49.0                | 49.4                | 48.5                | 49.0                  | 0.20 |
| 140     | 49.2                | 49.4                | 48.8                | 49.1                  | 0.09 |
| 150     | 49.1                | 49.2                | 48.6                | 49.0                  | 0.10 |
| 160     | 49.0                | 49.3                | 48.7                | 49.0                  | 0.09 |
| 170     | 48.4                | 49.1                | 48.3                | 48.6                  | 0.19 |
| 180     | 48.7                | 48.8                | 48.6                | 48.7                  | 0.01 |
| 190     | 48.2                | 48.7                | 47.9                | 48.3                  | 0.16 |
| 200     | 48.2                | 48.4                | 47.9                | 48.2                  | 0.06 |
| 210     | 48.1                | 48.5                | 47.7                | 48.1                  | 0.16 |
| 220     | 47.5                | 47.9                | 47.4                | 47.6                  | 0.07 |
| 230     | 47.1                | 47.7                | 47.1                | 47.3                  | 0.12 |
| 240     | 46.8                | 47.3                | 46.9                | 47.0                  | 0.07 |
| 250     | 46.7                | 46.5                | 46.7                | 46.6                  | 0.01 |



|                 |      |      |      |            |        |
|-----------------|------|------|------|------------|--------|
| 260             | 46.3 | 46.2 | 46.6 | 46.4       | 0.04   |
| 270             | 45.9 | 45.8 | 46.4 | 46.0       | 0.10   |
| 280             | 45.3 | 45.4 | 46.3 | 45.7       | 0.30   |
| 290             | 45.2 | 44.9 | 46.1 | 45.4       | 0.39   |
| 300             | 44.5 | 44.8 | 45.4 | 44.9       | 0.21   |
| 310             | 44.1 | 44.5 | 45.9 | 44.8       | 0.89   |
| 320             | 43.6 | 43.9 | 44.9 | 44.1       | 0.46   |
| 330             | 43.1 | 43.5 | 44.6 | 43.7       | 0.60   |
| 340             | 43.0 | 43.3 | 44.4 | 43.6       | 0.54   |
| 350             | 42.3 | 42.8 | 44.0 | 43.0       | 0.76   |
| 360             | 42.1 | 42.5 | 43.7 | 42.8       | 0.69   |
| 370             | 41.6 | 42.0 | 43.3 | 42.3       | 0.79   |
| 380             | 41.5 | 41.8 | 43.0 | 42.1       | 0.63   |
| 390             | 41.1 | 41.5 | 42.9 | 41.8       | 0.89   |
| 400             | 40.7 | 41.1 | 42.4 | 41.4       | 0.79   |
| 410             | 40.4 | 40.7 | 42.3 | 41.1       | 1.04   |
| 420             | 40.0 | 40.4 | 41.9 | 40.8       | 1.00   |
| 430             | 39.6 | 40.0 | 41.7 | 40.4       | 1.24   |
| 440             | 39.3 | 39.8 | 41.4 | 40.2       | 1.20   |
| 450             | 38.9 | 39.7 | 41.1 | 39.9       | 1.24   |
| 460             | 38.6 | 39.3 | 40.7 | 39.5       | 1.14   |
| 470             | 38.4 | 38.9 | 40.4 | 39.2       | 1.08   |
| 480             | 38.2 | 38.6 | 40.0 | 38.9       | 0.89   |
| 490             | 37.9 | 38.4 | 39.7 | 38.7       | 0.86   |
| 500             | 37.6 | 38.0 | 39.3 | 38.3       | 0.79   |
| 510             | 37.3 | 37.8 | 39.4 | 38.2       | 1.20   |
| 520             | 37.2 | 37.7 | 39.2 | 38.0       | 1.08   |
| 530             | 36.8 | 37.3 | 38.9 | 37.7       | 1.20   |
| 540             | 36.4 | 37.0 | 38.5 | 37.3       | 1.17   |
| 550             | 36.2 | 36.9 | 38.3 | 37.1       | 1.14   |
| Sample variance |      |      |      |            | 0.55   |
|                 |      |      |      | max D(T) = | 2.20   |
|                 |      |      |      | min D(T) = | 0      |
|                 |      |      |      | G=         | 0.0713 |
|                 |      |      |      | Sum D(T)=  | 30.89  |
|                 |      |      |      | G known=   | 0.1131 |

Table S2: Time variation, 10 s.

| 10 s    |                     |                     |                     |                       |      |
|---------|---------------------|---------------------|---------------------|-----------------------|------|
| Time, s | T <sub>1</sub> , °C | T <sub>2</sub> , °C | T <sub>3</sub> , °C | T <sub>med</sub> , °C | D(T) |
| 0       | 23.0                | 23.0                | 23.0                | 23.0                  | 0.00 |
| 10      | 31.7                | 32.6                | 30.2                | 31.5                  | 1.47 |
| 20      | 39.4                | 39.3                | 39.6                | 39.4                  | 0.02 |
| 30      | 39.5                | 40.5                | 41.0                | 40.3                  | 0.58 |
| 40      | 40.7                | 41.5                | 42.0                | 41.4                  | 0.43 |

|     |      |      |      |      |      |
|-----|------|------|------|------|------|
| 50  | 42.2 | 42.5 | 43.2 | 42.6 | 0.26 |
| 60  | 43.0 | 43.4 | 44.4 | 43.6 | 0.52 |
| 70  | 44.2 | 44.2 | 45.0 | 44.5 | 0.21 |
| 80  | 45.2 | 45.3 | 45.7 | 45.4 | 0.07 |
| 90  | 45.7 | 45.7 | 46.2 | 45.9 | 0.08 |
| 100 | 46.3 | 46.1 | 46.8 | 46.4 | 0.13 |
| 110 | 46.9 | 46.7 | 47.4 | 47.0 | 0.13 |
| 120 | 47.1 | 47.0 | 47.5 | 47.2 | 0.07 |
| 130 | 47.3 | 46.9 | 47.4 | 47.2 | 0.07 |
| 140 | 47.1 | 47.1 | 47.1 | 47.1 | 0.00 |
| 150 | 47.0 | 47.2 | 47.1 | 47.1 | 0.01 |
| 160 | 46.6 | 47.2 | 46.9 | 46.9 | 0.09 |
| 170 | 46.5 | 46.9 | 46.5 | 46.6 | 0.05 |
| 180 | 46.1 | 46.5 | 46.6 | 46.4 | 0.07 |
| 190 | 46.1 | 46.2 | 46.1 | 46.1 | 0.00 |
| 200 | 45.7 | 45.9 | 45.4 | 45.7 | 0.06 |
| 210 | 45.5 | 45.7 | 45.3 | 45.5 | 0.04 |
| 220 | 45.2 | 45.5 | 44.8 | 45.2 | 0.12 |
| 230 | 44.7 | 45.2 | 44.7 | 44.9 | 0.08 |
| 240 | 44.4 | 44.9 | 44.3 | 44.5 | 0.10 |
| 250 | 44.1 | 44.3 | 44.0 | 44.1 | 0.02 |
| 260 | 43.8 | 44.0 | 43.5 | 43.8 | 0.06 |
| 270 | 43.4 | 43.5 | 43.1 | 43.3 | 0.04 |
| 280 | 43.1 | 43.0 | 42.7 | 42.9 | 0.04 |
| 290 | 42.6 | 43.0 | 42.3 | 42.6 | 0.12 |
| 300 | 42.2 | 42.2 | 42.1 | 42.2 | 0.00 |
| 310 | 42.0 | 42.2 | 42.0 | 42.1 | 0.01 |
| 320 | 41.4 | 41.7 | 41.5 | 41.5 | 0.02 |
| 330 | 40.8 | 41.5 | 40.6 | 41.0 | 0.22 |
| 340 | 40.8 | 41.2 | 40.2 | 40.7 | 0.25 |
| 350 | 40.4 | 40.9 | 39.8 | 40.4 | 0.30 |
| 360 | 40.8 | 40.6 | 39.5 | 40.3 | 0.49 |
| 370 | 40.4 | 40.2 | 39.0 | 39.9 | 0.57 |
| 380 | 40.1 | 39.8 | 38.8 | 39.6 | 0.46 |
| 390 | 39.8 | 39.5 | 38.5 | 39.3 | 0.46 |
| 400 | 39.4 | 39.6 | 38.3 | 39.1 | 0.49 |
| 410 | 39.2 | 39.3 | 38.1 | 38.9 | 0.44 |
| 420 | 39.0 | 38.9 | 37.9 | 38.6 | 0.37 |
| 430 | 38.7 | 38.3 | 37.8 | 38.3 | 0.20 |
| 440 | 38.4 | 38.1 | 37.4 | 38.0 | 0.26 |
| 450 | 38.3 | 37.9 | 36.9 | 37.7 | 0.52 |
| 460 | 37.9 | 37.5 | 36.4 | 37.3 | 0.60 |
| 470 | 37.4 | 37.3 | 36.3 | 37.0 | 0.37 |
| 480 | 37.4 | 37.0 | 36.0 | 36.8 | 0.52 |
| 490 | 36.6 | 36.9 | 35.7 | 36.4 | 0.39 |

|                 |      |      |      |             |        |
|-----------------|------|------|------|-------------|--------|
| 500             | 35.7 | 36.7 | 35.4 | 35.9        | 0.46   |
| 510             | 35.6 | 36.2 | 35.3 | 35.7        | 0.21   |
| 520             | 35.1 | 36.1 | 35.0 | 35.4        | 0.37   |
| 530             | 35.4 | 35.7 | 34.9 | 35.3        | 0.16   |
| 540             | 35.0 | 35.8 | 34.7 | 35.2        | 0.32   |
| 550             | 34.7 | 35.2 | 34.3 | 34.7        | 0.20   |
| 560             | 34.5 | 34.9 | 34.1 | 34.5        | 0.16   |
| 570             | 34.3 | 34.8 | 34.0 | 34.4        | 0.16   |
| 580             | 34.3 | 34.7 | 33.4 | 34.1        | 0.44   |
| Sample variance |      |      |      |             | 0.25   |
|                 |      |      |      | max D(T) =  | 1.47   |
|                 |      |      |      | min D(T) =  | 23     |
|                 |      |      |      | G=          | 0.1015 |
|                 |      |      |      | C Sum D(T)= | 14.48  |
|                 |      |      |      | G known=    | 0.1131 |

Table S3: Time variation, 20 s.

| 20 s    |                     |                     |                     |                       |      |
|---------|---------------------|---------------------|---------------------|-----------------------|------|
| Time, s | T <sub>1</sub> , °C | T <sub>2</sub> , °C | T <sub>3</sub> , °C | T <sub>med</sub> , °C | D(T) |
| 0       | 23.0                | 23.0                | 23.0                | 23.0                  | 0.00 |
| 10      | 30.1                | 29.8                | 28.2                | 29.4                  | 1.04 |
| 20      | 32.0                | 30.1                | 29.8                | 30.6                  | 1.42 |
| 30      | 32.1                | 32.8                | 31.8                | 32.2                  | 0.26 |
| 40      | 40.0                | 40.5                | 41.5                | 40.7                  | 0.58 |
| 50      | 41.1                | 41.1                | 42.5                | 41.6                  | 0.65 |
| 60      | 42.6                | 42.7                | 42.7                | 42.7                  | 0.00 |
| 70      | 44.1                | 43.0                | 43.9                | 43.7                  | 0.34 |
| 80      | 45.2                | 43.0                | 44.9                | 44.4                  | 1.42 |
| 90      | 46.2                | 44.9                | 45.9                | 45.7                  | 0.46 |
| 100     | 46.9                | 46.4                | 46.7                | 46.7                  | 0.06 |
| 110     | 47.7                | 47.4                | 47.3                | 47.5                  | 0.04 |
| 120     | 48.2                | 48.2                | 47.9                | 48.1                  | 0.03 |
| 130     | 48.7                | 48.6                | 47.9                | 48.4                  | 0.19 |
| 140     | 48.8                | 48.8                | 48.1                | 48.6                  | 0.16 |
| 150     | 49.1                | 49.1                | 48.5                | 48.9                  | 0.12 |
| 160     | 48.8                | 48.6                | 48.6                | 48.7                  | 0.01 |
| 170     | 49.0                | 48.7                | 48.8                | 48.8                  | 0.02 |
| 180     | 48.7                | 48.6                | 48.9                | 48.7                  | 0.02 |
| 190     | 48.5                | 48.2                | 48.1                | 48.3                  | 0.04 |
| 200     | 48.0                | 48.1                | 48.1                | 48.1                  | 0.00 |
| 210     | 48.0                | 47.8                | 47.8                | 47.9                  | 0.01 |
| 220     | 47.7                | 47.3                | 47.9                | 47.6                  | 0.09 |
| 230     | 47.5                | 47.2                | 47.3                | 47.3                  | 0.02 |
| 240     | 47.3                | 46.9                | 46.9                | 47.0                  | 0.05 |
| 250     | 46.9                | 46.2                | 46.9                | 46.7                  | 0.16 |

|                 |      |      |      |            |        |
|-----------------|------|------|------|------------|--------|
| 260             | 46.5 | 45.9 | 46.6 | 46.3       | 0.14   |
| 270             | 45.8 | 45.7 | 46.2 | 45.9       | 0.07   |
| 280             | 45.8 | 45.3 | 45.9 | 45.7       | 0.10   |
| 290             | 44.8 | 44.9 | 45.4 | 45.0       | 0.10   |
| 300             | 44.4 | 44.5 | 45.2 | 44.7       | 0.19   |
| 310             | 43.9 | 44.3 | 44.6 | 44.3       | 0.12   |
| 320             | 43.6 | 44.0 | 44.5 | 44.0       | 0.20   |
| 330             | 43.3 | 43.5 | 44.0 | 43.6       | 0.13   |
| 340             | 42.8 | 43.3 | 43.8 | 43.3       | 0.25   |
| 350             | 42.6 | 42.7 | 43.5 | 42.9       | 0.24   |
| 360             | 42.2 | 42.5 | 43.0 | 42.6       | 0.16   |
| 370             | 41.8 | 42.5 | 42.7 | 42.3       | 0.22   |
| 380             | 41.5 | 42.0 | 42.4 | 42.0       | 0.20   |
| 390             | 41.5 | 41.3 | 42.0 | 41.6       | 0.13   |
| 400             | 41.1 | 41.2 | 41.6 | 41.3       | 0.07   |
| 410             | 40.5 | 40.9 | 41.3 | 40.9       | 0.16   |
| 420             | 40.1 | 40.6 | 41.0 | 40.6       | 0.20   |
| 430             | 39.9 | 40.1 | 40.7 | 40.2       | 0.17   |
| 440             | 39.6 | 39.8 | 40.4 | 39.9       | 0.17   |
| 450             | 39.1 | 39.7 | 40.0 | 39.6       | 0.21   |
| 460             | 39.2 | 39.3 | 39.8 | 39.4       | 0.10   |
| 470             | 38.5 | 39.0 | 39.4 | 39.0       | 0.20   |
| 480             | 38.2 | 38.8 | 39.1 | 38.7       | 0.21   |
| 490             | 38.1 | 38.3 | 38.9 | 38.4       | 0.17   |
| 500             | 37.7 | 38.0 | 38.7 | 38.1       | 0.26   |
| 510             | 37.5 | 37.7 | 38.3 | 37.8       | 0.17   |
| 520             | 37.4 | 37.5 | 38.1 | 37.7       | 0.14   |
| 530             | 37.2 | 37.4 | 37.9 | 37.5       | 0.13   |
| 540             | 36.8 | 37.0 | 37.9 | 37.2       | 0.34   |
| 550             | 36.5 | 36.7 | 37.7 | 37.0       | 0.41   |
| 560             | 36.3 | 36.6 | 37.4 | 36.8       | 0.32   |
| 570             | 36.1 | 36.3 | 37.4 | 36.6       | 0.49   |
| 580             | 35.9 | 36.0 | 37.7 | 36.5       | 1.02   |
| 590             | 35.8 | 35.6 | 37.4 | 36.3       | 0.97   |
| Sample variance |      |      |      |            | 0.26   |
|                 |      |      |      | max D(T) = | 1.42   |
|                 |      |      |      | min D(T) = | 0      |
|                 |      |      |      | G=         | 0.0918 |
|                 |      |      |      | Sum D(T)=  | 15.50  |
|                 |      |      |      | G known=   | 0.1131 |

Table S4: Time variation, 60 s.

| 60 s    |                     |                     |                     |                       |      |
|---------|---------------------|---------------------|---------------------|-----------------------|------|
| Time, s | T <sub>1</sub> , °C | T <sub>2</sub> , °C | T <sub>3</sub> , °C | T <sub>med</sub> , °C | D(T) |
| 0       | 23.0                | 23.0                | 23.0                | 23.0                  | 0.00 |

|     |      |      |      |      |      |
|-----|------|------|------|------|------|
| 10  | 28.9 | 27.6 | 28.2 | 28.2 | 0.42 |
| 20  | 28.6 | 27.2 | 28.1 | 28.0 | 0.50 |
| 30  | 28.4 | 26.8 | 27.2 | 27.5 | 0.69 |
| 40  | 28.1 | 26.5 | 27.4 | 27.3 | 0.64 |
| 50  | 27.9 | 26.7 | 26.9 | 27.2 | 0.41 |
| 60  | 27.8 | 28.5 | 29.7 | 28.7 | 0.92 |
| 70  | 36.0 | 37.6 | 38.8 | 37.5 | 1.97 |
| 80  | 38.9 | 39.9 | 39.6 | 39.5 | 0.26 |
| 90  | 39.2 | 39.6 | 39.8 | 39.5 | 0.09 |
| 100 | 40.7 | 39.5 | 40.4 | 40.2 | 0.39 |
| 110 | 41.4 | 40.6 | 41.4 | 41.1 | 0.21 |
| 120 | 42.4 | 41.3 | 42.3 | 42.0 | 0.37 |
| 130 | 43.5 | 42.0 | 43.0 | 42.8 | 0.58 |
| 140 | 44.1 | 43.0 | 43.5 | 43.5 | 0.30 |
| 150 | 44.7 | 43.5 | 44.4 | 44.2 | 0.39 |
| 160 | 45.3 | 44.3 | 44.6 | 44.7 | 0.26 |
| 170 | 45.4 | 44.7 | 44.8 | 45.0 | 0.14 |
| 180 | 45.3 | 45.1 | 45.1 | 45.2 | 0.01 |
| 190 | 45.6 | 45.4 | 45.2 | 45.4 | 0.04 |
| 200 | 45.7 | 45.9 | 45.4 | 45.7 | 0.06 |
| 210 | 45.8 | 46.2 | 45.5 | 45.8 | 0.12 |
| 220 | 45.7 | 45.7 | 45.4 | 45.6 | 0.03 |
| 230 | 45.6 | 45.9 | 45.1 | 45.5 | 0.16 |
| 240 | 45.2 | 46.3 | 45.1 | 45.5 | 0.44 |
| 250 | 45.1 | 46.2 | 44.7 | 45.3 | 0.60 |
| 260 | 44.7 | 46.0 | 44.6 | 45.1 | 0.61 |
| 270 | 44.7 | 45.9 | 44.4 | 45.0 | 0.63 |
| 280 | 44.4 | 46.0 | 44.5 | 45.0 | 0.80 |
| 290 | 43.9 | 45.8 | 44.2 | 44.6 | 1.04 |
| 300 | 43.7 | 45.6 | 43.9 | 44.4 | 1.09 |
| 310 | 43.4 | 45.5 | 43.7 | 44.2 | 1.29 |
| 320 | 43.2 | 45.2 | 43.5 | 44.0 | 1.16 |
| 330 | 43.1 | 45.0 | 43.1 | 43.7 | 1.20 |
| 340 | 42.7 | 44.7 | 42.8 | 43.4 | 1.27 |
| 350 | 41.7 | 44.9 | 42.6 | 43.1 | 2.72 |
| 360 | 41.5 | 44.5 | 42.2 | 42.7 | 2.46 |
| 370 | 41.4 | 44.2 | 42.0 | 42.5 | 2.17 |
| 380 | 40.9 | 43.9 | 41.7 | 42.2 | 2.41 |
| 390 | 40.5 | 43.7 | 41.1 | 41.8 | 2.89 |
| 400 | 40.2 | 43.5 | 40.8 | 41.5 | 3.09 |
| 410 | 39.8 | 43.1 | 40.5 | 41.1 | 3.02 |
| 420 | 39.6 | 42.9 | 40.1 | 40.9 | 3.16 |
| 430 | 39.2 | 42.5 | 40.0 | 40.6 | 2.96 |
| 440 | 39.1 | 42.1 | 39.5 | 40.2 | 2.65 |
| 450 | 38.7 | 41.8 | 39.2 | 39.9 | 2.77 |

|                 |      |      |      |            |        |
|-----------------|------|------|------|------------|--------|
| 460             | 38.5 | 41.6 | 39.0 | 39.7       | 2.77   |
| 470             | 38.3 | 41.1 | 38.8 | 39.4       | 2.23   |
| 480             | 38.0 | 41.1 | 38.5 | 39.2       | 2.77   |
| 490             | 37.6 | 41.1 | 38.3 | 39.0       | 3.43   |
| 500             | 37.4 | 40.7 | 38.0 | 38.7       | 3.09   |
| 510             | 37.0 | 40.5 | 37.3 | 38.3       | 3.76   |
| 520             | 36.7 | 40.4 | 37.0 | 38.0       | 4.22   |
| 530             | 36.3 | 39.3 | 36.8 | 37.5       | 2.58   |
| 540             | 36.4 | 39.2 | 36.5 | 37.4       | 2.52   |
| 550             | 36.0 | 38.7 | 36.4 | 37.0       | 2.12   |
| 560             | 35.7 | 38.7 | 36.0 | 36.8       | 2.73   |
| 570             | 35.5 | 38.2 | 35.9 | 36.5       | 2.12   |
| Sample variance |      |      |      |            | 1.45   |
|                 |      |      |      | max D(T) = | 4.22   |
|                 |      |      |      | min D(T) = | 0      |
|                 |      |      |      | G=         | 0.0504 |
|                 |      |      |      | Sum D(T)=  | 83.86  |
|                 |      |      |      | G known=   | 0.1131 |

Table S5: Solvent variation, chloroform.

| CHCl <sub>3</sub> |                     |                     |                     |                       |      |
|-------------------|---------------------|---------------------|---------------------|-----------------------|------|
| Time, s           | T <sub>1</sub> , °C | T <sub>2</sub> , °C | T <sub>3</sub> , °C | T <sub>med</sub> , °C | D(T) |
| 0                 | 23.0                | 23.0                | 23.0                | 23.0                  | 0.00 |
| 10                | 25.6                | 25.5                | 22.4                | 24.5                  | 3.31 |
| 20                | 37.9                | 37.3                | 36.9                | 37.4                  | 0.25 |
| 30                | 46.3                | 46.8                | 44.5                | 45.9                  | 1.46 |
| 40                | 46.9                | 45.2                | 45.4                | 45.8                  | 0.86 |
| 50                | 44.6                | 43.4                | 43.6                | 43.9                  | 0.41 |
| 60                | 43.5                | 41.9                | 42.1                | 42.5                  | 0.76 |
| 70                | 42.5                | 41.1                | 41.5                | 41.7                  | 0.52 |
| 80                | 41.8                | 40.6                | 40.9                | 41.1                  | 0.39 |
| 90                | 41.1                | 40.3                | 40.3                | 40.6                  | 0.21 |
| 100               | 40.4                | 40.2                | 40.3                | 40.3                  | 0.01 |
| 110               | 40.0                | 40.1                | 40.1                | 40.1                  | 0.00 |
| 120               | 39.6                | 39.9                | 40.3                | 39.9                  | 0.12 |
| 130               | 39.4                | 39.8                | 39.8                | 39.7                  | 0.05 |
| 140               | 39.0                | 39.5                | 39.8                | 39.4                  | 0.16 |
| 150               | 39.0                | 39.3                | 39.5                | 39.3                  | 0.06 |
| 160               | 38.8                | 39.2                | 39.2                | 39.1                  | 0.05 |
| 170               | 38.3                | 38.9                | 38.9                | 38.7                  | 0.12 |
| 180               | 37.8                | 38.6                | 39.0                | 38.5                  | 0.37 |
| 190               | 37.5                | 38.6                | 38.5                | 38.2                  | 0.37 |
| 200               | 37.4                | 38.4                | 38.3                | 38.0                  | 0.30 |
| 210               | 36.9                | 38.3                | 38.1                | 37.8                  | 0.57 |
| 220               | 36.9                | 38.0                | 37.9                | 37.6                  | 0.37 |

|                 |      |      |      |            |        |
|-----------------|------|------|------|------------|--------|
| 230             | 36.4 | 37.8 | 37.6 | 37.3       | 0.57   |
| 240             | 36.2 | 37.5 | 37.3 | 37.0       | 0.49   |
| 250             | 35.9 | 37.3 | 36.9 | 36.7       | 0.52   |
| 260             | 35.7 | 37.2 | 36.5 | 36.5       | 0.56   |
| 270             | 35.4 | 36.9 | 36.5 | 36.3       | 0.60   |
| 280             | 35.1 | 36.7 | 36.4 | 36.1       | 0.72   |
| 290             | 34.8 | 36.5 | 36.0 | 35.8       | 0.76   |
| 300             | 34.7 | 36.2 | 35.8 | 35.6       | 0.60   |
| 310             | 34.5 | 36.0 | 35.7 | 35.4       | 0.63   |
| 320             | 34.5 | 35.9 | 35.2 | 35.2       | 0.49   |
| 330             | 34.1 | 35.8 | 35.0 | 35.0       | 0.72   |
| 340             | 33.7 | 35.5 | 34.7 | 34.6       | 0.81   |
| 350             | 33.5 | 35.4 | 34.6 | 34.5       | 0.91   |
| 360             | 33.3 | 35.1 | 34.4 | 34.3       | 0.82   |
| 370             | 33.1 | 35.0 | 34.1 | 34.1       | 0.90   |
| 380             | 32.9 | 34.8 | 33.9 | 33.9       | 0.90   |
| 390             | 32.6 | 34.8 | 33.7 | 33.7       | 1.21   |
| 400             | 32.4 | 34.5 | 33.5 | 33.5       | 1.10   |
| 410             | 32.3 | 34.3 | 33.3 | 33.3       | 1.00   |
| 420             | 32.0 | 34.1 | 33.0 | 33.0       | 1.10   |
| 430             | 31.7 | 33.8 | 32.8 | 32.8       | 1.10   |
| 440             | 31.6 | 33.6 | 32.5 | 32.6       | 1.00   |
| 450             | 31.5 | 33.6 | 32.5 | 32.5       | 1.10   |
| 460             | 31.2 | 32.8 | 32.3 | 32.1       | 0.67   |
| 470             | 31.2 | 32.7 | 32.0 | 32.0       | 0.56   |
| 480             | 31.0 | 32.5 | 31.7 | 31.7       | 0.56   |
| 490             | 30.8 | 32.3 | 31.7 | 31.6       | 0.57   |
| 500             | 30.6 | 32.2 | 31.5 | 31.4       | 0.64   |
| 510             | 30.4 | 32.1 | 31.3 | 31.3       | 0.72   |
| 520             | 30.1 | 31.9 | 31.2 | 31.1       | 0.82   |
| 530             | 30.0 | 31.8 | 31.0 | 30.9       | 0.81   |
| 540             | 30.0 | 31.6 | 31.0 | 30.9       | 0.65   |
| 550             | 29.9 | 31.4 | 30.7 | 30.7       | 0.56   |
| 560             | 29.9 | 31.5 | 30.5 | 30.6       | 0.65   |
| 570             | 29.4 | 31.4 | 30.5 | 30.4       | 1.00   |
| Sample variance |      |      |      |            | 0.66   |
|                 |      |      |      | max D(T) = | 3.31   |
|                 |      |      |      | min D(T) = | 0      |
|                 |      |      |      | G=         | 0.0879 |
|                 |      |      |      | Sum D(T)=  | 37.67  |
|                 |      |      |      | G known=   | 0.1131 |

Table S6: Solvent variation, DMF.

| DMF     |                     |                     |                     |                       |      |
|---------|---------------------|---------------------|---------------------|-----------------------|------|
| Time, s | T <sub>1</sub> , °C | T <sub>2</sub> , °C | T <sub>3</sub> , °C | T <sub>med</sub> , °C | D(T) |

|     |      |      |      |      |      |
|-----|------|------|------|------|------|
| 0   | 23.0 | 23.0 | 23.0 | 23.0 | 0.00 |
| 10  | 38.8 | 39.4 | 38.5 | 38.9 | 0.21 |
| 20  | 41.7 | 43.4 | 41.2 | 42.1 | 1.33 |
| 30  | 42.7 | 44.2 | 42.7 | 43.2 | 0.75 |
| 40  | 45.0 | 44.7 | 45.8 | 45.2 | 0.32 |
| 50  | 46.9 | 43.1 | 45.7 | 45.2 | 3.77 |
| 60  | 48.0 | 45.1 | 44.8 | 46.0 | 3.12 |
| 70  | 49.0 | 46.4 | 46.3 | 47.2 | 2.34 |
| 80  | 49.6 | 47.3 | 47.7 | 48.2 | 1.51 |
| 90  | 49.8 | 48.1 | 48.7 | 48.9 | 0.74 |
| 100 | 50.3 | 48.5 | 49.2 | 49.3 | 0.82 |
| 110 | 50.1 | 48.9 | 49.7 | 49.6 | 0.37 |
| 120 | 50.3 | 49.4 | 50.2 | 50.0 | 0.24 |
| 130 | 50.5 | 49.8 | 50.1 | 50.1 | 0.12 |
| 140 | 50.4 | 50.0 | 50.5 | 50.3 | 0.07 |
| 150 | 50.2 | 49.9 | 50.5 | 50.2 | 0.09 |
| 160 | 50.0 | 50.0 | 50.2 | 50.1 | 0.01 |
| 170 | 49.9 | 49.9 | 50.4 | 50.1 | 0.08 |
| 180 | 49.5 | 49.8 | 50.3 | 49.9 | 0.16 |
| 190 | 49.0 | 49.5 | 50.1 | 49.5 | 0.30 |
| 200 | 48.9 | 49.7 | 49.8 | 49.5 | 0.24 |
| 210 | 48.7 | 49.4 | 49.8 | 49.3 | 0.31 |
| 220 | 48.2 | 49.3 | 49.2 | 48.9 | 0.37 |
| 230 | 47.9 | 49.0 | 49.3 | 48.7 | 0.54 |
| 240 | 47.5 | 48.7 | 48.8 | 48.3 | 0.52 |
| 250 | 47.2 | 48.4 | 48.4 | 48.0 | 0.48 |
| 260 | 46.5 | 48.1 | 47.9 | 47.5 | 0.76 |
| 270 | 46.2 | 47.7 | 47.4 | 47.1 | 0.63 |
| 280 | 45.9 | 47.7 | 47.1 | 46.9 | 0.84 |
| 290 | 45.6 | 47.1 | 46.7 | 46.5 | 0.60 |
| 300 | 45.1 | 46.9 | 46.6 | 46.2 | 0.93 |
| 310 | 44.8 | 46.5 | 46.2 | 45.8 | 0.82 |
| 320 | 44.5 | 46.3 | 45.9 | 45.6 | 0.89 |
| 330 | 44.1 | 45.4 | 45.7 | 45.1 | 0.72 |
| 340 | 43.7 | 45.2 | 45.3 | 44.7 | 0.80 |
| 350 | 44.0 | 44.7 | 44.8 | 44.5 | 0.19 |
| 360 | 43.3 | 44.7 | 44.8 | 44.3 | 0.70 |
| 370 | 43.1 | 44.2 | 44.3 | 43.9 | 0.44 |
| 380 | 42.7 | 43.8 | 44.1 | 43.5 | 0.54 |
| 390 | 42.4 | 43.3 | 43.5 | 43.1 | 0.34 |
| 400 | 41.9 | 42.9 | 43.2 | 42.7 | 0.46 |
| 410 | 41.8 | 42.6 | 42.8 | 42.4 | 0.28 |
| 420 | 41.4 | 42.3 | 42.2 | 42.0 | 0.24 |
| 430 | 41.1 | 42.0 | 42.0 | 41.7 | 0.27 |
| 440 | 40.5 | 41.8 | 41.8 | 41.4 | 0.56 |



|                 |      |      |      |            |        |
|-----------------|------|------|------|------------|--------|
| 450             | 40.0 | 41.5 | 41.6 | 41.0       | 0.80   |
| 460             | 39.7 | 41.2 | 41.2 | 40.7       | 0.75   |
| 470             | 39.5 | 40.9 | 40.8 | 40.4       | 0.61   |
| 480             | 39.3 | 40.8 | 40.7 | 40.3       | 0.70   |
| 490             | 39.1 | 40.5 | 40.4 | 40.0       | 0.61   |
| 500             | 38.9 | 40.0 | 40.1 | 39.7       | 0.44   |
| 510             | 38.7 | 39.8 | 39.9 | 39.5       | 0.44   |
| 520             | 38.2 | 39.6 | 39.7 | 39.2       | 0.70   |
| 530             | 38.0 | 39.2 | 39.4 | 38.9       | 0.57   |
| 540             | 37.9 | 39.1 | 38.9 | 38.6       | 0.41   |
| 550             | 37.6 | 38.9 | 39.1 | 38.5       | 0.66   |
| 560             | 37.4 | 38.4 | 38.7 | 38.2       | 0.46   |
| 570             | 37.4 | 38.3 | 38.7 | 38.1       | 0.44   |
| Sample variance |      |      |      |            | 0.66   |
|                 |      |      |      | max D(T) = | 3.77   |
|                 |      |      |      | min D(T) = | 0      |
|                 |      |      |      | G=         | 0.1005 |
|                 |      |      |      | Sum D(T)=  | 37.54  |
|                 |      |      |      | G known=   | 0.1131 |

Table S7: Solvent variation, CCl<sub>4</sub>.

| CCl <sub>4</sub> |                     |                     |                     |                       |      |
|------------------|---------------------|---------------------|---------------------|-----------------------|------|
| Time, s          | T <sub>1</sub> , °C | T <sub>2</sub> , °C | T <sub>3</sub> , °C | T <sub>med</sub> , °C | D(T) |
| 0                | 23.0                | 23.0                | 23.0                | 23.0                  | 0.00 |
| 10               | 25.2                | 27.0                | 26.5                | 26.2                  | 0.86 |
| 20               | 49.8                | 52.1                | 51.3                | 51.1                  | 1.36 |
| 30               | 48.5                | 49.4                | 50.6                | 49.5                  | 1.11 |
| 40               | 46.8                | 47.7                | 49.3                | 47.9                  | 1.60 |
| 50               | 45.8                | 45.5                | 46.9                | 46.1                  | 0.54 |
| 60               | 44.9                | 43.9                | 45.0                | 44.6                  | 0.37 |
| 70               | 44.2                | 43.2                | 43.7                | 43.7                  | 0.25 |
| 80               | 43.4                | 42.7                | 42.9                | 43.0                  | 0.13 |
| 90               | 43.0                | 42.4                | 42.3                | 42.6                  | 0.14 |
| 100              | 42.5                | 41.9                | 41.6                | 42.0                  | 0.21 |
| 110              | 42.1                | 41.6                | 41.2                | 41.6                  | 0.20 |
| 120              | 41.6                | 41.4                | 40.6                | 41.2                  | 0.28 |
| 130              | 41.3                | 41.1                | 40.3                | 40.9                  | 0.28 |
| 140              | 40.7                | 40.8                | 39.9                | 40.5                  | 0.24 |
| 150              | 40.0                | 40.2                | 39.5                | 39.9                  | 0.13 |
| 160              | 39.8                | 40.1                | 39.0                | 39.6                  | 0.32 |
| 170              | 39.4                | 39.7                | 38.8                | 39.3                  | 0.21 |
| 180              | 39.1                | 39.4                | 38.4                | 39.0                  | 0.26 |
| 190              | 38.7                | 39.1                | 37.9                | 38.6                  | 0.37 |
| 200              | 38.3                | 38.8                | 37.7                | 38.3                  | 0.30 |
| 210              | 38.0                | 38.5                | 37.4                | 38.0                  | 0.30 |

|                 |      |      |      |            |        |
|-----------------|------|------|------|------------|--------|
| 220             | 37.8 | 38.0 | 37.2 | 37.7       | 0.17   |
| 230             | 37.5 | 37.5 | 36.6 | 37.2       | 0.27   |
| 240             | 37.1 | 37.0 | 36.4 | 36.8       | 0.14   |
| 250             | 36.9 | 36.9 | 36.2 | 36.7       | 0.16   |
| 260             | 36.7 | 36.4 | 35.9 | 36.3       | 0.16   |
| 270             | 36.3 | 36.2 | 35.6 | 36.0       | 0.14   |
| 280             | 36.1 | 36.0 | 35.1 | 35.7       | 0.30   |
| 290             | 35.7 | 35.8 | 35.0 | 35.5       | 0.19   |
| 300             | 35.4 | 35.7 | 34.8 | 35.3       | 0.21   |
| 310             | 35.1 | 35.4 | 34.4 | 35.0       | 0.26   |
| 320             | 34.8 | 35.0 | 34.1 | 34.6       | 0.22   |
| 330             | 34.5 | 35.0 | 34.0 | 34.5       | 0.25   |
| 340             | 34.4 | 34.7 | 33.8 | 34.3       | 0.21   |
| 350             | 34.0 | 34.4 | 33.1 | 33.8       | 0.44   |
| 360             | 33.8 | 34.1 | 33.1 | 33.7       | 0.26   |
| 370             | 33.8 | 33.8 | 32.9 | 33.5       | 0.27   |
| 380             | 33.4 | 33.7 | 32.8 | 33.3       | 0.21   |
| 390             | 33.2 | 33.4 | 32.5 | 33.0       | 0.22   |
| 400             | 32.8 | 33.3 | 32.3 | 32.8       | 0.25   |
| 410             | 32.6 | 33.1 | 32.1 | 32.6       | 0.25   |
| 420             | 32.5 | 32.8 | 31.9 | 32.4       | 0.21   |
| 430             | 32.2 | 32.7 | 31.7 | 32.2       | 0.25   |
| 440             | 31.9 | 32.6 | 31.5 | 32.0       | 0.31   |
| 450             | 31.6 | 32.4 | 31.3 | 31.8       | 0.32   |
| 460             | 31.4 | 32.1 | 31.1 | 31.5       | 0.26   |
| 470             | 31.4 | 32.1 | 31.1 | 31.5       | 0.26   |
| 480             | 31.1 | 31.9 | 30.8 | 31.3       | 0.32   |
| 490             | 31.0 | 31.7 | 30.6 | 31.1       | 0.31   |
| 500             | 30.6 | 31.7 | 30.3 | 30.9       | 0.54   |
| 510             | 30.4 | 31.2 | 30.3 | 30.6       | 0.24   |
| 520             | 30.2 | 31.0 | 30.0 | 30.4       | 0.28   |
| 530             | 30.2 | 30.8 | 29.7 | 30.2       | 0.30   |
| 540             | 30.0 | 30.7 | 29.6 | 30.1       | 0.31   |
| 550             | 29.7 | 30.6 | 29.3 | 29.9       | 0.44   |
| 560             | 29.7 | 30.2 | 29.3 | 29.7       | 0.20   |
| Sample variance |      |      |      |            | 0.33   |
|                 |      |      |      | max D(T) = | 1.60   |
|                 |      |      |      | min D(T) = | 0      |
|                 |      |      |      | G=         | 0.0858 |
|                 |      |      |      | Sum D(T)=  | 18.70  |
|                 |      |      |      | G known=   | 0.1131 |

Table S8: Solvent variation, EtOH.

| EtOH    |                     |                     |                     |                       |      |
|---------|---------------------|---------------------|---------------------|-----------------------|------|
| Time, s | T <sub>1</sub> , °C | T <sub>2</sub> , °C | T <sub>3</sub> , °C | T <sub>med</sub> , °C | D(T) |

|     |      |      |      |      |      |
|-----|------|------|------|------|------|
| 0   | 23.0 | 23.0 | 23.0 | 23.0 | 0.00 |
| 10  | 34.4 | 35.0 | 33.5 | 34.3 | 0.57 |
| 20  | 35.4 | 35.6 | 33.5 | 34.8 | 1.34 |
| 30  | 36.3 | 36.3 | 36.0 | 36.2 | 0.03 |
| 40  | 37.2 | 37.2 | 37.1 | 37.2 | 0.00 |
| 50  | 37.6 | 37.9 | 37.8 | 37.8 | 0.02 |
| 60  | 38.4 | 38.4 | 38.7 | 38.5 | 0.03 |
| 70  | 38.7 | 38.9 | 39.7 | 39.1 | 0.28 |
| 80  | 39.4 | 39.3 | 40.3 | 39.7 | 0.30 |
| 90  | 39.4 | 39.8 | 40.8 | 40.0 | 0.52 |
| 100 | 39.8 | 40.1 | 41.3 | 40.4 | 0.63 |
| 110 | 40.2 | 40.6 | 41.5 | 40.8 | 0.44 |
| 120 | 40.2 | 40.5 | 41.8 | 40.8 | 0.72 |
| 130 | 40.0 | 40.6 | 41.9 | 40.8 | 0.94 |
| 140 | 41.6 | 40.8 | 42.1 | 41.5 | 0.43 |
| 150 | 41.4 | 40.7 | 41.9 | 41.3 | 0.36 |
| 160 | 41.9 | 40.7 | 42.2 | 41.6 | 0.63 |
| 170 | 42.1 | 41.1 | 42.2 | 41.8 | 0.37 |
| 180 | 41.2 | 40.8 | 41.9 | 41.3 | 0.31 |
| 190 | 41.6 | 40.6 | 41.8 | 41.3 | 0.41 |
| 200 | 41.2 | 40.7 | 41.5 | 41.1 | 0.16 |
| 210 | 41.0 | 40.6 | 41.2 | 40.9 | 0.09 |
| 220 | 40.7 | 39.9 | 41.1 | 40.6 | 0.37 |
| 230 | 40.9 | 39.7 | 41.1 | 40.6 | 0.57 |
| 240 | 40.4 | 39.6 | 40.8 | 40.3 | 0.37 |
| 250 | 40.1 | 39.5 | 40.6 | 40.1 | 0.30 |
| 260 | 40.5 | 39.1 | 40.4 | 40.0 | 0.61 |
| 270 | 40.3 | 39.1 | 40.1 | 39.8 | 0.41 |
| 280 | 40.1 | 38.9 | 40.0 | 39.7 | 0.44 |
| 290 | 39.6 | 38.7 | 39.6 | 39.3 | 0.27 |
| 300 | 39.6 | 38.6 | 39.3 | 39.2 | 0.26 |
| 310 | 39.2 | 38.3 | 39.2 | 38.9 | 0.27 |
| 320 | 39.1 | 38.1 | 38.8 | 38.7 | 0.26 |
| 330 | 38.9 | 37.8 | 38.7 | 38.5 | 0.34 |
| 340 | 38.4 | 37.6 | 38.2 | 38.1 | 0.17 |
| 350 | 38.7 | 37.6 | 38.0 | 38.1 | 0.31 |
| 360 | 38.4 | 37.4 | 37.8 | 37.9 | 0.25 |
| 370 | 38.1 | 37.3 | 37.7 | 37.7 | 0.16 |
| 380 | 37.9 | 36.9 | 37.3 | 37.4 | 0.25 |
| 390 | 35.8 | 36.8 | 37.0 | 36.5 | 0.41 |
| 400 | 35.7 | 36.5 | 36.8 | 36.3 | 0.32 |
| 410 | 35.3 | 36.2 | 36.5 | 36.0 | 0.39 |
| 420 | 35.2 | 36.1 | 36.3 | 35.9 | 0.34 |
| 430 | 34.9 | 36.0 | 36.1 | 35.7 | 0.44 |
| 440 | 34.6 | 35.9 | 35.8 | 35.4 | 0.52 |

|                 |      |      |      |            |        |
|-----------------|------|------|------|------------|--------|
| 450             | 34.5 | 35.6 | 35.6 | 35.2       | 0.40   |
| 460             | 34.4 | 35.5 | 35.7 | 35.2       | 0.49   |
| 470             | 34.0 | 35.2 | 35.5 | 34.9       | 0.63   |
| 480             | 33.9 | 34.9 | 35.4 | 34.7       | 0.58   |
| 490             | 33.7 | 34.8 | 35.2 | 34.6       | 0.60   |
| 500             | 33.4 | 34.6 | 35.1 | 34.4       | 0.76   |
| 510             | 33.4 | 34.3 | 34.7 | 34.1       | 0.44   |
| 520             | 33.1 | 34.2 | 34.4 | 33.9       | 0.49   |
| 530             | 32.8 | 34.1 | 34.3 | 33.7       | 0.66   |
| 540             | 32.8 | 34.0 | 34.0 | 33.6       | 0.48   |
| 550             | 32.6 | 33.7 | 33.9 | 33.4       | 0.49   |
| 560             | 32.2 | 33.9 | 33.7 | 33.3       | 0.86   |
| 570             | 32.3 | 33.5 | 33.6 | 33.1       | 0.52   |
| 580             | 32.0 | 33.4 | 33.4 | 32.9       | 0.65   |
| 590             | 31.8 | 33.4 | 33.1 | 32.8       | 0.72   |
| 600             | 31.8 | 33.4 | 32.9 | 32.7       | 0.67   |
| Sample variance |      |      |      |            | 0.43   |
|                 |      |      |      | max D(T) = | 1.34   |
|                 |      |      |      | min D(T) = | 0      |
|                 |      |      |      | G=         | 0.0513 |
|                 |      |      |      | Sum D(T)=  | 26.18  |
|                 |      |      |      | G known=   | 0.1131 |

Table S9: Solvent variation, iso-propanol.

| <i>i</i> -PrOH |                     |                     |                     |                       |       |
|----------------|---------------------|---------------------|---------------------|-----------------------|-------|
| Time, s        | T <sub>1</sub> , °C | T <sub>2</sub> , °C | T <sub>3</sub> , °C | T <sub>med</sub> , °C | D(T)  |
| 0              | 23.0                | 23.0                | 23.0                | 23.0                  | 0.00  |
| 10             | 29.3                | 32.1                | 24.9                | 28.8                  | 13.17 |
| 20             | 32.8                | 34.4                | 30.0                | 32.4                  | 4.96  |
| 30             | 32.1                | 36.4                | 29.3                | 32.6                  | 12.79 |
| 40             | 35.4                | 37.9                | 30.3                | 34.5                  | 15.00 |
| 50             | 37.3                | 38.9                | 34.1                | 36.8                  | 5.97  |
| 60             | 38.7                | 40.1                | 38.5                | 39.1                  | 0.76  |
| 70             | 40.1                | 41.3                | 37.1                | 39.5                  | 4.68  |
| 80             | 41.1                | 42.4                | 39.7                | 41.1                  | 1.82  |
| 90             | 42.0                | 43.1                | 41.4                | 42.2                  | 0.74  |
| 100            | 42.2                | 43.7                | 42.4                | 42.8                  | 0.66  |
| 110            | 42.9                | 43.9                | 43.3                | 43.4                  | 0.25  |
| 120            | 42.9                | 44.0                | 43.7                | 43.5                  | 0.32  |
| 130            | 43.2                | 44.0                | 44.0                | 43.7                  | 0.21  |
| 140            | 43.6                | 44.5                | 44.7                | 44.3                  | 0.34  |
| 150            | 43.5                | 44.7                | 44.3                | 44.2                  | 0.37  |
| 160            | 43.6                | 44.3                | 44.1                | 44.0                  | 0.13  |
| 170            | 43.3                | 44.2                | 44.1                | 43.9                  | 0.24  |
| 180            | 43.3                | 44.0                | 43.6                | 43.6                  | 0.12  |

|                 |      |      |      |            |       |
|-----------------|------|------|------|------------|-------|
| 190             | 42.9 | 43.8 | 43.6 | 43.4       | 0.22  |
| 200             | 42.9 | 43.6 | 43.2 | 43.2       | 0.12  |
| 210             | 42.7 | 43.7 | 42.8 | 43.1       | 0.30  |
| 220             | 42.2 | 43.4 | 42.4 | 42.7       | 0.41  |
| 230             | 41.9 | 43.2 | 41.7 | 42.3       | 0.66  |
| 240             | 41.6 | 42.8 | 41.4 | 41.9       | 0.57  |
| 250             | 41.3 | 42.4 | 40.8 | 41.5       | 0.67  |
| 260             | 40.9 | 42.0 | 40.3 | 41.1       | 0.74  |
| 270             | 40.9 | 41.8 | 40.0 | 40.9       | 0.81  |
| 280             | 40.4 | 42.2 | 39.6 | 40.7       | 1.77  |
| 290             | 40.1 | 41.4 | 39.2 | 40.2       | 1.22  |
| 300             | 39.9 | 41.0 | 38.8 | 39.9       | 1.21  |
| 310             | 39.5 | 40.8 | 38.4 | 39.6       | 1.44  |
| 320             | 39.4 | 40.5 | 38.0 | 39.3       | 1.57  |
| 330             | 39.0 | 40.3 | 37.6 | 39.0       | 1.82  |
| 340             | 38.7 | 39.8 | 37.3 | 38.6       | 1.57  |
| 350             | 38.5 | 39.6 | 37.0 | 38.4       | 1.70  |
| 360             | 38.2 | 39.7 | 36.6 | 38.2       | 2.40  |
| 370             | 37.9 | 39.3 | 36.3 | 37.8       | 2.25  |
| 380             | 37.7 | 39.2 | 36.1 | 37.7       | 2.40  |
| 390             | 37.6 | 38.8 | 35.7 | 37.4       | 2.44  |
| 400             | 37.2 | 38.5 | 35.4 | 37.0       | 2.42  |
| 410             | 37.1 | 38.2 | 34.9 | 36.7       | 2.82  |
| 420             | 36.8 | 38.0 | 34.9 | 36.6       | 2.44  |
| 430             | 36.6 | 37.5 | 34.4 | 36.2       | 2.54  |
| 440             | 36.2 | 37.3 | 34.1 | 35.9       | 2.64  |
| 450             | 35.9 | 37.4 | 33.8 | 35.7       | 3.27  |
| 460             | 35.6 | 37.2 | 33.6 | 35.5       | 3.25  |
| 470             | 35.3 | 36.9 | 33.6 | 35.3       | 2.72  |
| 480             | 35.4 | 36.6 | 33.1 | 35.0       | 3.16  |
| 490             | 35.0 | 36.5 | 32.9 | 34.8       | 3.27  |
| 500             | 35.0 | 36.1 | 32.7 | 34.6       | 3.01  |
| 510             | 34.7 | 35.7 | 32.5 | 34.3       | 2.68  |
| 520             | 34.4 | 35.6 | 32.4 | 34.1       | 2.61  |
| 530             | 34.3 | 35.3 | 32.0 | 33.9       | 2.86  |
| 540             | 34.0 | 37.6 | 32.0 | 34.5       | 8.05  |
| 550             | 33.8 | 37.3 | 31.8 | 34.3       | 7.75  |
| 560             | 33.7 | 36.9 | 31.6 | 34.1       | 7.12  |
| 570             | 33.4 | 37.0 | 31.7 | 34.0       | 7.32  |
| 580             | 33.4 | 36.8 | 31.4 | 33.9       | 7.45  |
| 590             | 33.4 | 36.7 | 31.2 | 33.8       | 7.66  |
| 600             | 33.4 | 36.5 | 31.0 | 33.6       | 7.60  |
| Sample variance |      |      |      |            | 2.98  |
|                 |      |      |      | max D(T) = | 15.00 |
|                 |      |      |      | min D(T) = | 0     |

|           |        |
|-----------|--------|
| G=        | 0.0826 |
| Sum D(T)= | 181.61 |
| G known=  | 0.1131 |

Table S10: Solvent variation, dioxane.

| Dioxane |                     |                     |                     |                       |      |
|---------|---------------------|---------------------|---------------------|-----------------------|------|
| Time, s | T <sub>1</sub> , °C | T <sub>2</sub> , °C | T <sub>3</sub> , °C | T <sub>med</sub> , °C | D(T) |
| 0       | 23.0                | 23.0                | 23.0                | 23.0                  | 0.00 |
| 10      | 27.8                | 29.3                | 30.8                | 29.3                  | 2.25 |
| 20      | 31.7                | 29.7                | 32.3                | 31.2                  | 1.85 |
| 30      | 33.6                | 33.9                | 32.3                | 33.3                  | 0.72 |
| 40      | 34.8                | 34.9                | 34.2                | 34.6                  | 0.14 |
| 50      | 36.4                | 36.7                | 35.7                | 36.3                  | 0.26 |
| 60      | 37.5                | 37.6                | 37.2                | 37.4                  | 0.04 |
| 70      | 38.4                | 38.3                | 38.6                | 38.4                  | 0.02 |
| 80      | 39.2                | 38.9                | 39.6                | 39.2                  | 0.12 |
| 90      | 39.9                | 39.6                | 40.5                | 40.0                  | 0.21 |
| 100     | 40.5                | 40.2                | 41.0                | 40.6                  | 0.16 |
| 110     | 40.8                | 40.4                | 41.4                | 40.9                  | 0.25 |
| 120     | 41.2                | 40.9                | 41.6                | 41.2                  | 0.12 |
| 130     | 41.4                | 40.9                | 41.9                | 41.4                  | 0.25 |
| 140     | 41.6                | 41.2                | 42.2                | 41.7                  | 0.25 |
| 150     | 41.8                | 40.6                | 42.2                | 41.5                  | 0.69 |
| 160     | 41.9                | 40.6                | 42.4                | 41.6                  | 0.86 |
| 170     | 41.9                | 41.7                | 42.3                | 42.0                  | 0.09 |
| 180     | 41.8                | 41.5                | 42.2                | 41.8                  | 0.12 |
| 190     | 41.9                | 41.4                | 42.2                | 41.8                  | 0.16 |
| 200     | 41.7                | 40.8                | 42.0                | 41.5                  | 0.39 |
| 210     | 41.5                | 40.7                | 42.0                | 41.4                  | 0.43 |
| 220     | 41.5                | 40.5                | 41.8                | 41.3                  | 0.46 |
| 230     | 41.1                | 40.3                | 41.7                | 41.0                  | 0.49 |
| 240     | 41.1                | 40.0                | 41.4                | 40.8                  | 0.54 |
| 250     | 40.9                | 39.8                | 41.2                | 40.6                  | 0.54 |
| 260     | 40.6                | 39.5                | 41.0                | 40.4                  | 0.60 |
| 270     | 40.3                | 39.2                | 40.8                | 40.1                  | 0.67 |
| 280     | 40.1                | 38.9                | 40.3                | 39.8                  | 0.57 |
| 290     | 39.8                | 38.7                | 40.0                | 39.5                  | 0.49 |
| 300     | 39.6                | 38.3                | 39.8                | 39.2                  | 0.66 |
| 310     | 39.2                | 38.0                | 39.6                | 38.9                  | 0.69 |
| 320     | 39.1                | 37.7                | 39.2                | 38.7                  | 0.70 |
| 330     | 38.9                | 37.4                | 39.0                | 38.4                  | 0.80 |
| 340     | 38.6                | 37.2                | 39.1                | 38.3                  | 0.97 |
| 350     | 38.3                | 36.8                | 38.7                | 37.9                  | 1.00 |
| 360     | 38.1                | 36.6                | 38.4                | 37.7                  | 0.93 |

|                 |      |      |      |            |        |
|-----------------|------|------|------|------------|--------|
| 370             | 37.8 | 36.4 | 38.2 | 37.5       | 0.89   |
| 380             | 37.5 | 36.1 | 37.9 | 37.2       | 0.89   |
| 390             | 37.6 | 35.9 | 37.6 | 37.0       | 0.96   |
| 400             | 37.5 | 35.7 | 37.4 | 36.9       | 1.02   |
| 410             | 37.3 | 35.4 | 37.0 | 36.6       | 1.04   |
| 420             | 37.0 | 35.2 | 36.8 | 36.3       | 0.97   |
| 430             | 36.8 | 35.0 | 36.7 | 36.2       | 1.02   |
| 440             | 36.7 | 34.6 | 36.5 | 35.9       | 1.34   |
| 450             | 36.5 | 34.7 | 36.1 | 35.8       | 0.89   |
| 460             | 36.2 | 34.4 | 36.0 | 35.5       | 0.97   |
| 470             | 35.9 | 34.2 | 35.7 | 35.3       | 0.86   |
| 480             | 35.9 | 33.9 | 35.4 | 35.1       | 1.08   |
| 490             | 35.6 | 33.8 | 35.1 | 34.8       | 0.86   |
| 500             | 35.4 | 33.6 | 35.1 | 34.7       | 0.93   |
| 510             | 35.0 | 33.5 | 34.8 | 34.4       | 0.66   |
| 520             | 34.9 | 33.1 | 34.7 | 34.2       | 0.97   |
| 530             | 34.5 | 32.9 | 34.5 | 34.0       | 0.85   |
| 540             | 34.2 | 32.8 | 34.3 | 33.8       | 0.70   |
| 550             | 34.0 | 32.6 | 34.2 | 33.6       | 0.76   |
| 560             | 33.8 | 32.3 | 34.0 | 33.4       | 0.86   |
| 570             | 33.7 | 32.1 | 33.7 | 33.2       | 0.85   |
| 580             | 33.5 | 32.0 | 33.5 | 33.0       | 0.75   |
| 590             | 33.3 | 31.9 | 33.3 | 32.8       | 0.65   |
| 600             | 33.0 | 31.7 | 33.3 | 32.7       | 0.72   |
| Sample variance |      |      |      |            | 0.67   |
|                 |      |      |      | max D(T) = | 2.25   |
|                 |      |      |      | min D(T) = | 0      |
|                 |      |      |      | G=         | 0.0547 |
|                 |      |      |      | Sum D(T)=  | 41.14  |
|                 |      |      |      | G known=   | 0.1131 |

Table S11: Solvent variation, dichloroethane.

| DCE     |                     |                     |                     |                       |      |
|---------|---------------------|---------------------|---------------------|-----------------------|------|
| Time, s | T <sub>1</sub> , °C | T <sub>2</sub> , °C | T <sub>3</sub> , °C | T <sub>med</sub> , °C | D(T) |
| 0       | 23.0                | 23.0                | 23.0                | 23.0                  | 0.00 |
| 10      | 22.8                | 21.8                | 21.9                | 22.2                  | 0.30 |
| 20      | 22.5                | 21.5                | 21.0                | 21.7                  | 0.58 |
| 30      | 22.1                | 24.0                | 22.8                | 23.0                  | 0.92 |
| 40      | 25.3                | 25.2                | 24.2                | 24.9                  | 0.37 |
| 50      | 27.2                | 26.1                | 25.8                | 26.4                  | 0.54 |
| 60      | 29.6                | 27.1                | 26.7                | 27.8                  | 2.47 |
| 70      | 30.0                | 28.1                | 28.6                | 28.9                  | 0.97 |
| 80      | 30.9                | 29.5                | 30.3                | 30.2                  | 0.49 |
| 90      | 31.6                | 30.7                | 31.9                | 31.4                  | 0.39 |

|     |      |      |      |      |      |
|-----|------|------|------|------|------|
| 100 | 32.6 | 31.8 | 34.1 | 32.8 | 1.36 |
| 110 | 33.9 | 33.7 | 35.8 | 34.5 | 1.34 |
| 120 | 36.3 | 35.3 | 37.0 | 36.2 | 0.73 |
| 130 | 38.0 | 36.2 | 37.3 | 37.2 | 0.82 |
| 140 | 39.3 | 37.1 | 37.5 | 38.0 | 1.37 |
| 150 | 38.2 | 38.0 | 37.9 | 38.0 | 0.02 |
| 160 | 38.5 | 38.4 | 38.5 | 38.5 | 0.00 |
| 170 | 38.9 | 39.4 | 38.8 | 39.0 | 0.10 |
| 180 | 39.5 | 39.9 | 39.2 | 39.5 | 0.12 |
| 190 | 39.7 | 40.1 | 39.4 | 39.7 | 0.12 |
| 200 | 40.2 | 40.8 | 39.6 | 40.2 | 0.36 |
| 210 | 40.8 | 41.0 | 39.9 | 40.6 | 0.34 |
| 220 | 41.0 | 41.7 | 40.2 | 41.0 | 0.56 |
| 230 | 40.8 | 41.9 | 40.1 | 40.9 | 0.82 |
| 240 | 41.1 | 41.4 | 39.8 | 40.8 | 0.72 |
| 250 | 40.2 | 41.0 | 39.6 | 40.3 | 0.49 |
| 260 | 40.1 | 40.6 | 39.1 | 39.9 | 0.58 |
| 270 | 39.8 | 40.3 | 38.9 | 39.7 | 0.50 |
| 280 | 39.9 | 39.9 | 38.7 | 39.5 | 0.48 |
| 290 | 39.7 | 39.5 | 38.2 | 39.1 | 0.66 |
| 300 | 39.3 | 39.1 | 37.9 | 38.8 | 0.57 |
| 310 | 39.0 | 38.8 | 37.7 | 38.5 | 0.49 |
| 320 | 38.6 | 38.5 | 37.3 | 38.1 | 0.52 |
| 330 | 38.2 | 38.1 | 37.0 | 37.8 | 0.44 |
| 340 | 37.9 | 37.6 | 36.7 | 37.4 | 0.39 |
| 350 | 37.8 | 37.3 | 36.6 | 37.2 | 0.36 |
| 360 | 37.3 | 37.0 | 36.2 | 36.8 | 0.32 |
| 370 | 36.9 | 36.7 | 35.8 | 36.5 | 0.34 |
| 380 | 36.9 | 36.4 | 35.7 | 36.3 | 0.36 |
| 390 | 36.6 | 36.2 | 35.3 | 36.0 | 0.44 |
| 400 | 36.2 | 35.8 | 35.1 | 35.7 | 0.31 |
| 410 | 35.8 | 35.7 | 34.8 | 35.4 | 0.30 |
| 420 | 35.6 | 35.2 | 34.6 | 35.1 | 0.25 |
| 430 | 35.3 | 34.9 | 34.4 | 34.9 | 0.20 |
| 440 | 35.0 | 34.8 | 34.0 | 34.6 | 0.28 |
| 450 | 34.7 | 34.5 | 34.1 | 34.4 | 0.09 |
| 460 | 34.4 | 34.3 | 33.8 | 34.2 | 0.10 |
| 470 | 34.2 | 34.2 | 33.3 | 33.9 | 0.27 |
| 480 | 33.9 | 33.8 | 33.3 | 33.7 | 0.10 |
| 490 | 33.7 | 33.6 | 33.0 | 33.4 | 0.14 |
| 500 | 33.6 | 33.4 | 32.9 | 33.3 | 0.13 |
| 510 | 33.3 | 33.1 | 32.6 | 33.0 | 0.13 |
| 520 | 33.0 | 32.8 | 32.5 | 32.8 | 0.06 |
| 530 | 32.8 | 32.7 | 32.2 | 32.6 | 0.10 |
| 540 | 32.6 | 32.6 | 32.2 | 32.5 | 0.05 |



|                 |      |      |      |            |        |
|-----------------|------|------|------|------------|--------|
| 550             | 32.4 | 32.3 | 31.9 | 32.2       | 0.07   |
| 560             | 32.2 | 32.2 | 31.8 | 32.1       | 0.05   |
| 570             | 32.0 | 31.8 | 31.6 | 31.8       | 0.04   |
| 580             | 32.0 | 32.0 | 31.4 | 31.8       | 0.12   |
| Sample variance |      |      |      |            | 0.44   |
|                 |      |      |      | max D(T) = | 2.47   |
|                 |      |      |      | min D(T) = | 0      |
|                 |      |      |      | G=         | 0.0962 |
|                 |      |      |      | Sum D(T)=  | 25.68  |
|                 |      |      |      | G known=   | 0.1131 |

Table S12: Solvent variation, hexane.

| Hexane  |                     |                     |                     |                       |      |
|---------|---------------------|---------------------|---------------------|-----------------------|------|
| Time, s | T <sub>1</sub> , °C | T <sub>2</sub> , °C | T <sub>3</sub> , °C | T <sub>med</sub> , °C | D(T) |
| 0       | 23.0                | 23.0                | 23.0                | 23.0                  | 0.00 |
| 10      | 22.6                | 22.6                | 23.6                | 22.9                  | 0.33 |
| 20      | 35.1                | 36.7                | 34.8                | 35.5                  | 1.04 |
| 30      | 50.6                | 51.0                | 50.8                | 50.8                  | 0.04 |
| 40      | 44.8                | 44.9                | 47.2                | 45.6                  | 1.84 |
| 50      | 44.0                | 43.7                | 44.2                | 44.0                  | 0.06 |
| 60      | 43.3                | 43.4                | 44.1                | 43.6                  | 0.19 |
| 70      | 42.8                | 42.5                | 44.0                | 43.1                  | 0.63 |
| 80      | 42.5                | 42.1                | 44.2                | 42.9                  | 1.24 |
| 90      | 42.2                | 42.0                | 43.8                | 42.7                  | 0.97 |
| 100     | 41.8                | 41.6                | 43.3                | 42.2                  | 0.86 |
| 110     | 41.4                | 41.3                | 42.7                | 41.8                  | 0.61 |
| 120     | 41.0                | 41.1                | 42.5                | 41.5                  | 0.70 |
| 130     | 40.5                | 40.5                | 42.2                | 41.1                  | 0.96 |
| 140     | 40.2                | 40.4                | 41.8                | 40.8                  | 0.76 |
| 150     | 39.8                | 39.6                | 41.2                | 40.2                  | 0.76 |
| 160     | 39.3                | 39.4                | 40.7                | 39.8                  | 0.61 |
| 170     | 38.8                | 39.0                | 40.5                | 39.4                  | 0.86 |
| 180     | 38.8                | 38.8                | 39.9                | 39.2                  | 0.40 |
| 190     | 38.2                | 38.4                | 39.4                | 38.7                  | 0.41 |
| 200     | 37.9                | 38.0                | 39.1                | 38.3                  | 0.44 |
| 210     | 37.6                | 37.8                | 38.7                | 38.0                  | 0.34 |
| 220     | 37.2                | 37.6                | 38.4                | 37.7                  | 0.37 |
| 230     | 37.1                | 37.1                | 37.8                | 37.3                  | 0.16 |
| 240     | 36.8                | 37.2                | 37.6                | 37.2                  | 0.16 |
| 250     | 36.2                | 36.6                | 37.3                | 36.7                  | 0.31 |
| 260     | 35.9                | 36.4                | 36.8                | 36.4                  | 0.20 |
| 270     | 35.6                | 36.0                | 36.6                | 36.1                  | 0.25 |
| 280     | 35.3                | 35.9                | 36.3                | 35.8                  | 0.25 |
| 290     | 35.1                | 35.5                | 36.0                | 35.5                  | 0.20 |

|                 |      |      |      |            |        |
|-----------------|------|------|------|------------|--------|
| 300             | 34.8 | 35.1 | 35.7 | 35.2       | 0.21   |
| 310             | 34.7 | 34.9 | 35.3 | 35.0       | 0.09   |
| 320             | 34.5 | 34.7 | 35.3 | 34.8       | 0.17   |
| 330             | 34.2 | 34.4 | 34.9 | 34.5       | 0.13   |
| 340             | 33.9 | 34.3 | 34.7 | 34.3       | 0.16   |
| 350             | 33.7 | 33.9 | 34.5 | 34.0       | 0.17   |
| 360             | 33.5 | 33.6 | 34.1 | 33.7       | 0.10   |
| 370             | 33.3 | 33.5 | 34.0 | 33.6       | 0.13   |
| 380             | 33.2 | 33.7 | 33.7 | 33.5       | 0.08   |
| 390             | 32.9 | 33.3 | 33.5 | 33.2       | 0.09   |
| 400             | 32.6 | 33.1 | 33.2 | 33.0       | 0.10   |
| 410             | 32.4 | 32.7 | 32.8 | 32.6       | 0.04   |
| 420             | 32.2 | 32.4 | 32.6 | 32.4       | 0.04   |
| 430             | 32.3 | 32.2 | 32.3 | 32.3       | 0.00   |
| 440             | 32.1 | 32.1 | 32.1 | 32.1       | 0.00   |
| 450             | 31.9 | 31.8 | 32.0 | 31.9       | 0.01   |
| 460             | 31.6 | 31.7 | 31.8 | 31.7       | 0.01   |
| 470             | 31.4 | 31.4 | 31.6 | 31.5       | 0.01   |
| 480             | 31.3 | 31.4 | 31.3 | 31.3       | 0.00   |
| 490             | 30.8 | 31.1 | 31.2 | 31.0       | 0.04   |
| 500             | 30.9 | 30.9 | 30.9 | 30.9       | 0.00   |
| 510             | 30.6 | 30.9 | 30.7 | 30.7       | 0.02   |
| 520             | 30.1 | 30.6 | 30.7 | 30.5       | 0.10   |
| 530             | 30.3 | 30.4 | 30.3 | 30.3       | 0.00   |
| 540             | 29.9 | 30.4 | 30.2 | 30.2       | 0.06   |
| 550             | 29.7 | 29.9 | 30.0 | 29.9       | 0.02   |
| 560             | 29.7 | 29.9 | 29.9 | 29.8       | 0.01   |
| Sample variance |      |      |      |            | 0.31   |
|                 |      |      |      | max D(T) = | 1.84   |
|                 |      |      |      | min D(T) = | 0      |
|                 |      |      |      | G=         | 0.1032 |
|                 |      |      |      | Sum D(T)=  | 17.87  |
|                 |      |      |      | G known=   | 0.1131 |

Table S13: Solvent variation, ethylene glycol.

| Ethylene glycol |                     |                     |                     |                     |                       |      |
|-----------------|---------------------|---------------------|---------------------|---------------------|-----------------------|------|
| Time, s         | T <sub>1</sub> , °C | T <sub>2</sub> , °C | T <sub>3</sub> , °C | T <sub>4</sub> , °C | T <sub>med</sub> , °C | D(T) |
| 0               | 23.0                | 23.0                | 23.0                | 23.0                | 23.0                  | 0.00 |
| 10              | 28.9                | 31.6                | 28.1                | 28.6                | 29.3                  | 2.46 |
| 20              | 28.3                | 30.1                | 27.9                | 28.1                | 28.6                  | 1.03 |
| 30              | 28.4                | 29.4                | 28.0                | 27.5                | 28.3                  | 0.65 |
| 40              | 30.5                | 28.7                | 30.2                | 27.2                | 29.2                  | 2.31 |
| 50              | 31.5                | 30.1                | 30.7                | 29.0                | 30.3                  | 1.11 |
| 60              | 32.0                | 30.5                | 31.0                | 29.6                | 30.8                  | 1.00 |

|     |      |      |      |      |      |      |
|-----|------|------|------|------|------|------|
| 70  | 31.9 | 30.5 | 31.1 | 29.6 | 30.8 | 0.94 |
| 80  | 31.7 | 30.8 | 29.0 | 30.1 | 30.4 | 1.30 |
| 90  | 32.0 | 31.0 | 29.0 | 30.2 | 30.6 | 1.61 |
| 100 | 32.0 | 30.9 | 29.4 | 30.4 | 30.7 | 1.17 |
| 110 | 32.1 | 31.2 | 29.5 | 30.4 | 30.8 | 1.23 |
| 120 | 32.3 | 31.2 | 29.7 | 30.5 | 30.9 | 1.22 |
| 130 | 32.1 | 31.5 | 29.4 | 30.6 | 30.9 | 1.38 |
| 140 | 32.4 | 31.5 | 29.7 | 30.8 | 31.1 | 1.30 |
| 150 | 32.6 | 31.4 | 29.8 | 30.7 | 31.1 | 1.40 |
| 160 | 32.7 | 31.1 | 29.9 | 30.7 | 31.1 | 1.39 |
| 170 | 32.7 | 31.2 | 29.9 | 30.8 | 31.2 | 1.36 |
| 180 | 32.7 | 31.3 | 29.9 | 30.9 | 31.2 | 1.35 |
| 190 | 32.7 | 31.4 | 30.0 | 30.9 | 31.3 | 1.27 |
| 200 | 32.7 | 31.6 | 30.0 | 33.1 | 31.9 | 1.92 |
| 210 | 31.1 | 31.4 | 31.4 | 33.2 | 31.8 | 0.92 |
| 220 | 31.2 | 31.5 | 31.5 | 32.9 | 31.8 | 0.58 |
| 230 | 31.1 | 31.7 | 31.4 | 32.9 | 31.8 | 0.62 |
| 240 | 31.2 | 31.7 | 31.5 | 33.0 | 31.9 | 0.63 |
| 250 | 31.3 | 31.7 | 31.8 | 33.2 | 32.0 | 0.69 |
| 260 | 31.1 | 31.6 | 31.7 | 33.1 | 31.9 | 0.74 |
| 270 | 31.2 | 30.9 | 31.6 | 33.1 | 31.7 | 0.95 |
| 280 | 31.2 | 31.1 | 31.4 | 33.2 | 31.7 | 0.98 |
| 290 | 31.2 | 30.9 | 31.5 | 33.1 | 31.7 | 0.96 |
| 300 | 31.2 | 31.0 | 31.7 | 33.3 | 31.8 | 1.09 |
| 310 | 31.3 | 31.0 | 31.6 | 33.0 | 31.7 | 0.78 |
| 320 | 31.2 | 30.9 | 31.6 | 32.9 | 31.7 | 0.78 |
| 330 | 31.1 | 31.1 | 31.5 | 32.9 | 31.7 | 0.73 |
| 340 | 31.2 | 30.9 | 31.3 | 32.8 | 31.6 | 0.72 |
| 350 | 31.2 | 31.0 | 31.2 | 32.9 | 31.6 | 0.79 |
| 360 | 31.2 | 31.0 | 31.2 | 32.9 | 31.6 | 0.79 |
| 370 | 31.2 | 30.9 | 31.2 | 32.8 | 31.5 | 0.74 |
| 380 | 31.3 | 31.0 | 31.2 | 32.9 | 31.6 | 0.77 |
| 390 | 31.2 | 30.9 | 31.2 | 32.8 | 31.5 | 0.74 |
| 400 | 31.2 | 31.4 | 31.3 | 32.7 | 31.7 | 0.50 |
| 410 | 31.1 | 31.5 | 31.4 | 32.8 | 31.7 | 0.57 |
| 420 | 31.1 | 31.4 | 31.1 | 32.7 | 31.6 | 0.58 |
| 430 | 31.1 | 31.3 | 31.1 | 32.6 | 31.5 | 0.52 |
| 440 | 31.3 | 31.5 | 30.9 | 34.9 | 32.2 | 3.42 |
| 450 | 31.2 | 31.2 | 31.1 | 34.0 | 31.9 | 2.01 |
| 460 | 30.9 | 31.2 | 31.6 | 33.0 | 31.7 | 0.86 |
| 470 | 30.7 | 31.3 | 31.5 | 32.7 | 31.6 | 0.70 |
| 480 | 30.7 | 31.3 | 31.4 | 32.8 | 31.6 | 0.79 |
| 490 | 30.7 | 31.5 | 31.4 | 32.6 | 31.6 | 0.62 |
| 500 | 30.5 | 31.3 | 31.4 | 32.8 | 31.5 | 0.91 |
| 510 | 30.6 | 31.4 | 31.6 | 32.9 | 31.6 | 0.91 |

|                 |      |      |      |      |            |        |
|-----------------|------|------|------|------|------------|--------|
| 520             | 30.6 | 31.3 | 31.3 | 32.9 | 31.5       | 0.95   |
| 530             | 30.5 | 31.0 | 31.4 | 32.8 | 31.4       | 0.98   |
| 540             | 30.6 | 31.0 | 31.5 | 32.5 | 31.4       | 0.67   |
| 550             | 30.6 | 31.0 | 31.5 | 32.6 | 31.4       | 0.75   |
| 560             | 30.6 | 30.9 | 31.4 | 32.7 | 31.4       | 0.86   |
| 570             | 30.7 | 31.1 | 31.3 | 30.4 | 30.9       | 0.16   |
| 580             | 30.7 | 30.9 | 31.4 | 30.3 | 30.8       | 0.21   |
| 590             | 30.5 | 30.9 | 31.4 | 30.2 | 30.8       | 0.27   |
| 600             | 30.4 | 30.9 | 31.6 | 30.1 | 30.8       | 0.43   |
| Sample variance |      |      |      |      |            | 0.98   |
|                 |      |      |      |      | max D(T) = | 3.42   |
|                 |      |      |      |      | min D(T) = | 0      |
|                 |      |      |      |      | G=         | 0.0570 |
|                 |      |      |      |      | Sum D(T)=  | 60.08  |
|                 |      |      |      |      | G known=   | 0.0895 |

Table S14: Solvent variation, water.

| H <sub>2</sub> O |                     |                     |                     |                       |      |
|------------------|---------------------|---------------------|---------------------|-----------------------|------|
| Time, s          | T <sub>1</sub> , °C | T <sub>2</sub> , °C | T <sub>3</sub> , °C | T <sub>med</sub> , °C | D(T) |
| 0                | 23.0                | 23.0                | 23.0                | 23.0                  | 0.00 |
| 10               | 23.3                | 22.7                | 22.3                | 22.8                  | 0.25 |
| 20               | 59.2                | 54.8                | 56.9                | 57.0                  | 4.84 |
| 30               | 71.3                | 69.4                | 73.8                | 71.5                  | 4.87 |
| 40               | 57.7                | 57.0                | 58.3                | 57.7                  | 0.42 |
| 50               | 48.2                | 49.6                | 50.3                | 49.4                  | 1.14 |
| 60               | 44.5                | 42.3                | 44.9                | 43.9                  | 1.96 |
| 70               | 41.7                | 39.9                | 42.5                | 41.4                  | 1.77 |
| 80               | 39.4                | 38.1                | 38.5                | 38.7                  | 0.44 |
| 90               | 37.7                | 36.6                | 38.3                | 37.5                  | 0.74 |
| 100              | 36.0                | 35.5                | 38.3                | 36.6                  | 2.23 |
| 110              | 34.7                | 34.6                | 38.3                | 35.9                  | 4.44 |
| 120              | 33.7                | 33.6                | 37.7                | 35.0                  | 5.47 |
| 130              | 33.5                | 33.6                | 37.6                | 34.9                  | 5.47 |
| 140              | 33.5                | 33.7                | 37.7                | 35.0                  | 5.61 |
| 150              | 33.3                | 33.5                | 37.6                | 34.8                  | 5.89 |
| 160              | 33.1                | 33.4                | 37.3                | 34.6                  | 5.49 |
| 170              | 33.0                | 33.2                | 37.0                | 34.4                  | 5.08 |
| 180              | 33.1                | 33.1                | 37.2                | 34.5                  | 5.60 |
| 190              | 33.0                | 33.0                | 37.0                | 34.3                  | 5.33 |
| 200              | 32.9                | 32.9                | 36.9                | 34.2                  | 5.33 |
| 210              | 32.9                | 32.9                | 36.8                | 34.2                  | 5.07 |
| 220              | 32.8                | 32.8                | 36.7                | 34.1                  | 5.07 |
| 230              | 32.6                | 32.6                | 36.6                | 33.9                  | 5.33 |
| 240              | 32.5                | 32.5                | 36.4                | 33.8                  | 5.07 |

|                 |      |      |      |      |            |
|-----------------|------|------|------|------|------------|
| 250             | 32.6 | 32.6 | 36.3 | 33.8 | 4.56       |
| 260             | 32.3 | 32.3 | 36.1 | 33.6 | 4.81       |
| 270             | 32.2 | 32.2 | 36.0 | 33.5 | 4.81       |
| 280             | 32.2 | 32.2 | 35.9 | 33.4 | 4.56       |
| 290             | 32.1 | 32.1 | 35.8 | 33.3 | 4.56       |
| 300             | 31.9 | 31.9 | 35.7 | 33.2 | 4.81       |
| 310             | 32.0 | 32.0 | 35.7 | 33.2 | 4.56       |
| 320             | 31.6 | 31.6 | 35.5 | 32.9 | 5.07       |
| 330             | 31.5 | 31.5 | 35.4 | 32.8 | 5.07       |
| 340             | 31.5 | 31.5 | 35.1 | 32.7 | 4.32       |
| 350             | 31.3 | 31.3 | 35.1 | 32.6 | 4.81       |
| 360             | 31.2 | 31.2 | 35.1 | 32.5 | 5.07       |
| 370             | 31.2 | 31.2 | 35.0 | 32.5 | 4.81       |
| 380             | 31.2 | 31.2 | 34.9 | 32.4 | 4.56       |
| 390             | 31.0 | 31.0 | 34.7 | 32.2 | 4.56       |
| 400             | 31.0 | 31.0 | 34.5 | 32.2 | 4.08       |
| 410             | 30.8 | 30.8 | 34.5 | 32.0 | 4.56       |
| 420             | 30.6 | 30.6 | 34.2 | 31.8 | 4.32       |
| 430             | 30.6 | 30.6 | 34.0 | 31.7 | 3.85       |
| 440             | 30.4 | 30.4 | 34.0 | 31.6 | 4.32       |
| 450             | 30.4 | 30.4 | 34.0 | 31.6 | 4.32       |
| 460             | 30.4 | 30.4 | 33.8 | 31.5 | 3.85       |
| 470             | 30.3 | 30.3 | 33.8 | 31.5 | 4.08       |
| 480             | 30.3 | 30.3 | 33.8 | 31.5 | 4.08       |
| 490             | 30.0 | 30.0 | 33.9 | 31.3 | 5.07       |
| 500             | 30.1 | 30.1 | 33.7 | 31.3 | 4.32       |
| 510             | 29.9 | 29.9 | 33.7 | 31.2 | 4.81       |
| 520             | 30.0 | 30.0 | 33.3 | 31.1 | 3.63       |
| 530             | 30.0 | 30.0 | 33.2 | 31.1 | 3.41       |
| 540             | 29.8 | 29.8 | 33.1 | 30.9 | 3.63       |
| 550             | 29.7 | 29.7 | 32.9 | 30.8 | 3.41       |
| 560             | 29.7 | 29.7 | 32.7 | 30.7 | 3.00       |
| 570             | 29.3 | 29.3 | 32.6 | 30.4 | 3.63       |
| 580             | 29.4 | 29.4 | 32.6 | 30.5 | 3.41       |
| 590             | 29.3 | 29.3 | 32.7 | 30.4 | 3.85       |
| 600             | 29.2 | 29.2 | 32.6 | 30.3 | 3.85       |
| Sample variance |      |      |      |      | 4.06       |
|                 |      |      |      |      | max D(T) = |
|                 |      |      |      |      | 5.89       |
|                 |      |      |      |      | min D(T) = |
|                 |      |      |      |      | 0          |
|                 |      |      |      |      | G=         |
|                 |      |      |      |      | 0.0238     |
|                 |      |      |      |      | Sum D(T)=  |
|                 |      |      |      |      | 247.45     |
|                 |      |      |      |      | G known=   |
|                 |      |      |      |      | 0.1131     |

Table S15: Loading variations, 1.

| 0.87 g (0.65 g pure $\text{CaC}_2$ ) |            |            |            |                       |      |
|--------------------------------------|------------|------------|------------|-----------------------|------|
| Time, s                              | $T_1$ , °C | $T_2$ , °C | $T_3$ , °C | $T_{\text{med}}$ , °C | D(T) |
| 0                                    | 23.0       | 23.0       | 23.0       | 23.0                  | 0.00 |
| 10                                   | 34.4       | 34.3       | 32.5       | 33.7                  | 1.14 |
| 20                                   | 33.1       | 32.8       | 30.8       | 32.2                  | 1.56 |
| 30                                   | 31.8       | 31.1       | 29.2       | 30.7                  | 1.81 |
| 40                                   | 41.0       | 43.2       | 41.3       | 41.8                  | 1.42 |
| 50                                   | 44.1       | 44.2       | 44.8       | 44.4                  | 0.14 |
| 60                                   | 46.9       | 46.4       | 46.4       | 46.6                  | 0.08 |
| 70                                   | 49.6       | 48.5       | 49.2       | 49.1                  | 0.31 |
| 80                                   | 51.4       | 50.6       | 51.2       | 51.1                  | 0.17 |
| 90                                   | 52.9       | 52.3       | 52.6       | 52.6                  | 0.09 |
| 100                                  | 54.4       | 53.7       | 54.0       | 54.0                  | 0.12 |
| 110                                  | 55.6       | 55.2       | 55.5       | 55.4                  | 0.04 |
| 120                                  | 56.8       | 55.9       | 56.5       | 56.4                  | 0.21 |
| 130                                  | 57.3       | 56.7       | 57.4       | 57.1                  | 0.14 |
| 140                                  | 57.6       | 57.5       | 58.2       | 57.8                  | 0.14 |
| 150                                  | 57.9       | 57.9       | 58.9       | 58.2                  | 0.33 |
| 160                                  | 58.2       | 58.3       | 59.5       | 58.7                  | 0.52 |
| 170                                  | 58.1       | 58.5       | 59.4       | 58.7                  | 0.44 |
| 180                                  | 58.2       | 58.5       | 59.8       | 58.8                  | 0.72 |
| 190                                  | 58.1       | 58.6       | 60.0       | 58.9                  | 0.97 |
| 200                                  | 58.0       | 58.4       | 59.9       | 58.8                  | 1.00 |
| 210                                  | 57.7       | 58.3       | 59.8       | 58.6                  | 1.17 |
| 220                                  | 57.5       | 58.0       | 59.6       | 58.4                  | 1.20 |
| 230                                  | 57.1       | 57.7       | 59.3       | 58.0                  | 1.29 |
| 240                                  | 56.7       | 57.5       | 59.2       | 57.8                  | 1.63 |
| 250                                  | 56.4       | 57.1       | 58.9       | 57.5                  | 1.66 |
| 260                                  | 56.1       | 56.8       | 58.6       | 57.2                  | 1.66 |
| 270                                  | 55.6       | 56.5       | 57.9       | 56.7                  | 1.34 |
| 280                                  | 55.2       | 56.2       | 57.8       | 56.4                  | 1.72 |
| 290                                  | 54.6       | 55.7       | 57.3       | 55.9                  | 1.84 |
| 300                                  | 54.3       | 55.4       | 57.0       | 55.6                  | 1.84 |
| 310                                  | 53.9       | 55.0       | 56.4       | 55.1                  | 1.57 |
| 320                                  | 53.3       | 54.4       | 56.2       | 54.6                  | 2.14 |
| 330                                  | 52.9       | 54.0       | 55.6       | 54.2                  | 1.84 |
| 340                                  | 52.6       | 53.6       | 55.3       | 53.8                  | 1.86 |
| 350                                  | 52.1       | 53.2       | 54.8       | 53.4                  | 1.84 |
| 360                                  | 51.7       | 52.9       | 54.5       | 53.0                  | 1.97 |
| 370                                  | 51.1       | 52.3       | 54.2       | 52.5                  | 2.44 |
| 380                                  | 50.8       | 52.0       | 53.5       | 52.1                  | 1.83 |
| 390                                  | 50.5       | 51.7       | 53.1       | 51.8                  | 1.69 |
| 400                                  | 50.0       | 51.1       | 52.8       | 51.3                  | 1.99 |
| 410                                  | 49.8       | 50.7       | 52.4       | 51.0                  | 1.74 |
| 420                                  | 49.3       | 50.3       | 51.8       | 50.5                  | 1.58 |

|                 |      |      |      |            |        |
|-----------------|------|------|------|------------|--------|
| 430             | 48.9 | 50.1 | 51.6 | 50.2       | 1.83   |
| 440             | 48.4 | 49.9 | 51.1 | 49.8       | 1.83   |
| 450             | 48.1 | 49.4 | 50.9 | 49.5       | 1.96   |
| 460             | 47.7 | 49.5 | 50.5 | 49.2       | 2.01   |
| 470             | 47.2 | 48.9 | 50.1 | 48.7       | 2.12   |
| 480             | 46.8 | 48.4 | 49.6 | 48.3       | 1.97   |
| 490             | 46.5 | 47.9 | 49.2 | 47.9       | 1.82   |
| 500             | 46.2 | 47.5 | 48.8 | 47.5       | 1.69   |
| 510             | 45.8 | 46.6 | 48.3 | 46.9       | 1.63   |
| 520             | 45.3 | 46.4 | 47.9 | 46.5       | 1.70   |
| 530             | 44.8 | 46.0 | 47.5 | 46.1       | 1.83   |
| 540             | 44.6 | 45.5 | 47.0 | 45.7       | 1.47   |
| 550             | 44.0 | 45.4 | 46.7 | 45.4       | 1.82   |
| Sample variance |      |      |      |            | 1.30   |
|                 |      |      |      | max D(T) = | 2.44   |
|                 |      |      |      | min D(T) = | 0      |
|                 |      |      |      | G=         | 0.0335 |
|                 |      |      |      | Sum D(T)=  | 73.00  |
|                 |      |      |      | G known=   | 0.1131 |

Table S16: Loading variations, 2.

| 1.28 g (0.96 g pure $\text{CaC}_2$ ) |            |            |            |                       |      |
|--------------------------------------|------------|------------|------------|-----------------------|------|
| Time, s                              | $T_1$ , °C | $T_2$ , °C | $T_3$ , °C | $T_{\text{med}}$ , °C | D(T) |
| 0                                    | 23.0       | 23.0       | 23.0       | 23.0                  | 0.00 |
| 10                                   | 34.3       | 31.9       | 34.6       | 33.6                  | 2.19 |
| 20                                   | 33.8       | 30.7       | 33.2       | 32.6                  | 2.70 |
| 30                                   | 45.1       | 44.0       | 42.5       | 43.9                  | 1.70 |
| 40                                   | 49.6       | 48.1       | 48.9       | 48.9                  | 0.56 |
| 50                                   | 53.7       | 52.2       | 53.2       | 53.0                  | 0.58 |
| 60                                   | 57.8       | 55.5       | 57.5       | 56.9                  | 1.56 |
| 70                                   | 61.3       | 58.9       | 61.2       | 60.5                  | 1.84 |
| 80                                   | 64.3       | 61.4       | 64.0       | 63.2                  | 2.54 |
| 90                                   | 66.6       | 64.0       | 67.0       | 65.9                  | 2.65 |
| 100                                  | 68.8       | 66.0       | 69.4       | 68.1                  | 3.29 |
| 110                                  | 70.4       | 67.8       | 70.8       | 69.7                  | 2.65 |
| 120                                  | 71.6       | 69.0       | 71.9       | 70.8                  | 2.54 |
| 130                                  | 72.2       | 69.9       | 72.9       | 71.7                  | 2.46 |
| 140                                  | 72.8       | 70.6       | 73.5       | 72.3                  | 2.29 |
| 150                                  | 73.1       | 71.1       | 73.8       | 72.7                  | 1.96 |
| 160                                  | 72.8       | 71.4       | 74.0       | 72.7                  | 1.69 |
| 170                                  | 72.6       | 71.4       | 73.9       | 72.6                  | 1.56 |
| 180                                  | 72.6       | 71.7       | 73.4       | 72.6                  | 0.72 |
| 190                                  | 72.1       | 71.2       | 73.4       | 72.2                  | 1.22 |
| 200                                  | 71.7       | 71.1       | 73.1       | 72.0                  | 1.05 |
| 210                                  | 71.2       | 70.7       | 72.5       | 71.5                  | 0.86 |

|                 |      |      |      |            |        |
|-----------------|------|------|------|------------|--------|
| 220             | 70.5 | 70.3 | 72.0 | 70.9       | 0.86   |
| 230             | 69.9 | 69.7 | 71.6 | 70.4       | 1.09   |
| 240             | 69.4 | 69.4 | 71.1 | 70.0       | 0.96   |
| 250             | 68.7 | 68.7 | 70.4 | 69.3       | 0.96   |
| 260             | 68.0 | 68.2 | 70.0 | 68.7       | 1.21   |
| 270             | 66.9 | 67.5 | 69.4 | 67.9       | 1.70   |
| 280             | 66.4 | 66.9 | 69.0 | 67.4       | 1.90   |
| 290             | 65.5 | 66.1 | 68.4 | 66.7       | 2.34   |
| 300             | 65.2 | 65.6 | 67.8 | 66.2       | 1.96   |
| 310             | 64.7 | 64.8 | 66.9 | 65.5       | 1.54   |
| 320             | 64.1 | 64.2 | 66.4 | 64.9       | 1.69   |
| 330             | 63.6 | 63.6 | 65.7 | 64.3       | 1.47   |
| 340             | 63.2 | 63.1 | 65.0 | 63.8       | 1.14   |
| 350             | 62.7 | 62.4 | 64.4 | 63.2       | 1.16   |
| 360             | 62.2 | 61.7 | 63.9 | 62.6       | 1.33   |
| 370             | 61.5 | 61.1 | 63.3 | 62.0       | 1.37   |
| 380             | 61.0 | 60.6 | 62.8 | 61.5       | 1.37   |
| 390             | 60.6 | 60.0 | 62.0 | 60.9       | 1.05   |
| 400             | 60.0 | 59.7 | 61.5 | 60.4       | 0.93   |
| 410             | 59.7 | 58.9 | 61.0 | 59.9       | 1.12   |
| 420             | 59.1 | 58.5 | 60.6 | 59.4       | 1.17   |
| 430             | 58.5 | 57.9 | 59.8 | 58.7       | 0.94   |
| 440             | 58.0 | 57.5 | 59.3 | 58.3       | 0.86   |
| 450             | 57.0 | 56.7 | 58.4 | 57.4       | 0.82   |
| 460             | 56.5 | 56.3 | 57.9 | 56.9       | 0.76   |
| 470             | 56.0 | 55.7 | 57.4 | 56.4       | 0.82   |
| 480             | 55.4 | 55.0 | 57.0 | 55.8       | 1.12   |
| 490             | 54.7 | 54.4 | 56.6 | 55.2       | 1.42   |
| 500             | 54.3 | 54.0 | 56.1 | 54.8       | 1.29   |
| 510             | 53.9 | 53.6 | 55.7 | 54.4       | 1.29   |
| 520             | 53.3 | 53.0 | 55.1 | 53.8       | 1.29   |
| 530             | 52.9 | 52.5 | 55.7 | 53.7       | 3.04   |
| 540             | 52.4 | 52.2 | 55.1 | 53.2       | 2.62   |
| 550             | 51.8 | 51.7 | 55.1 | 52.9       | 3.74   |
| Sample variance |      |      |      |            | 1.55   |
|                 |      |      |      | max D(T) = | 3.74   |
|                 |      |      |      | min D(T) = | 0      |
|                 |      |      |      | G=         | 0.0430 |
|                 |      |      |      | Sum D(T)=  | 87.07  |
|                 |      |      |      | G known=   | 0.1131 |

Table S17: Loading variations, 3.

| 1.76 g (1.32 g pure $\text{CaC}_2$ ) |            |            |            |                       |      |
|--------------------------------------|------------|------------|------------|-----------------------|------|
| Time, s                              | $T_1$ , °C | $T_2$ , °C | $T_3$ , °C | $T_{\text{med}}$ , °C | D(T) |
| 0                                    | 23.0       | 23.0       | 23.0       | 23.0                  | 0.00 |



|     |      |      |      |      |       |
|-----|------|------|------|------|-------|
| 10  | 33.2 | 34.4 | 34.4 | 34.0 | 0.48  |
| 20  | 32.3 | 34.3 | 33.3 | 33.3 | 1.00  |
| 30  | 34.9 | 38.2 | 36.9 | 36.7 | 2.76  |
| 40  | 48.7 | 49.2 | 50.2 | 49.4 | 0.58  |
| 50  | 56.4 | 57.7 | 58.2 | 57.4 | 0.86  |
| 60  | 62.8 | 62.6 | 64.6 | 63.3 | 1.21  |
| 70  | 66.7 | 67.4 | 70.1 | 68.1 | 3.22  |
| 80  | 72.3 | 71.1 | 73.6 | 72.3 | 1.56  |
| 90  | 75.9 | 75.0 | 77.2 | 76.0 | 1.22  |
| 100 | 78.6 | 77.9 | 81.1 | 79.2 | 2.83  |
| 110 | 81.1 | 80.3 | 82.6 | 81.3 | 1.36  |
| 120 | 82.3 | 81.6 | 83.3 | 82.4 | 0.73  |
| 130 | 83.6 | 83.2 | 84.1 | 83.6 | 0.20  |
| 140 | 83.6 | 83.8 | 84.1 | 83.8 | 0.06  |
| 150 | 84.2 | 84.3 | 83.7 | 84.1 | 0.10  |
| 160 | 83.6 | 84.3 | 83.6 | 83.8 | 0.16  |
| 170 | 83.5 | 84.2 | 82.9 | 83.5 | 0.42  |
| 180 | 82.8 | 84.1 | 82.2 | 83.0 | 0.94  |
| 190 | 82.1 | 83.2 | 81.7 | 82.3 | 0.60  |
| 200 | 82.0 | 82.7 | 80.8 | 81.8 | 0.92  |
| 210 | 80.4 | 82.1 | 80.2 | 80.9 | 1.09  |
| 220 | 82.2 | 81.3 | 79.4 | 81.0 | 2.04  |
| 230 | 82.1 | 80.5 | 78.1 | 80.2 | 4.05  |
| 240 | 82.0 | 79.8 | 77.2 | 79.7 | 5.77  |
| 250 | 81.7 | 78.8 | 76.2 | 78.9 | 7.57  |
| 260 | 79.5 | 78.1 | 75.4 | 77.7 | 4.34  |
| 270 | 79.6 | 77.3 | 74.6 | 77.2 | 6.26  |
| 280 | 80.1 | 76.8 | 74.5 | 77.1 | 7.92  |
| 290 | 78.9 | 75.9 | 73.1 | 76.0 | 8.41  |
| 300 | 78.6 | 74.8 | 72.3 | 75.2 | 10.06 |
| 310 | 78.1 | 73.7 | 71.5 | 74.4 | 11.29 |
| 320 | 76.6 | 72.8 | 70.7 | 73.4 | 8.94  |
| 330 | 76.2 | 72.3 | 69.7 | 72.7 | 10.70 |
| 340 | 75.6 | 71.4 | 68.8 | 71.9 | 11.77 |
| 350 | 71.1 | 70.4 | 68.2 | 69.9 | 2.29  |
| 360 | 70.5 | 70.0 | 67.5 | 69.3 | 2.58  |
| 370 | 69.7 | 68.9 | 66.7 | 68.4 | 2.41  |
| 380 | 69.2 | 68.3 | 65.8 | 67.8 | 3.10  |
| 390 | 68.1 | 67.4 | 65.0 | 66.8 | 2.64  |
| 400 | 67.1 | 66.5 | 64.2 | 65.9 | 2.34  |
| 410 | 66.4 | 65.9 | 63.4 | 65.2 | 2.58  |
| 420 | 65.8 | 64.8 | 63.0 | 64.5 | 2.01  |
| 430 | 65.5 | 64.3 | 62.3 | 64.0 | 2.61  |
| 440 | 64.6 | 63.3 | 61.5 | 63.1 | 2.42  |
| 450 | 64.0 | 62.5 | 61.0 | 62.5 | 2.25  |

|                 |      |      |      |      |            |
|-----------------|------|------|------|------|------------|
| 460             | 63.3 | 62.0 | 60.4 | 61.9 | 2.11       |
| 470             | 62.8 | 61.1 | 59.8 | 61.2 | 2.26       |
| 480             | 62.0 | 60.6 | 59.2 | 60.6 | 1.96       |
| 490             | 61.5 | 60.0 | 58.9 | 60.1 | 1.70       |
| 500             | 60.8 | 59.4 | 58.5 | 59.6 | 1.34       |
| 510             | 60.3 | 58.4 | 57.4 | 58.7 | 2.17       |
| 520             | 59.7 | 58.1 | 56.9 | 58.2 | 1.97       |
| 530             | 59.0 | 57.4 | 56.5 | 57.6 | 1.60       |
| 540             | 58.5 | 56.8 | 55.7 | 57.0 | 1.99       |
| 550             | 58.0 | 56.2 | 55.1 | 56.4 | 2.14       |
| Sample variance |      |      |      |      | 3.00       |
|                 |      |      |      |      | max D(T) = |
|                 |      |      |      |      | 11.77      |
|                 |      |      |      |      | min D(T) = |
|                 |      |      |      |      | 0          |
|                 |      |      |      |      | G=         |
|                 |      |      |      |      | 0.0701     |
|                 |      |      |      |      | Sum D(T)=  |
|                 |      |      |      |      | 168.03     |
|                 |      |      |      |      | G known=   |
|                 |      |      |      |      | 0.1131     |

Table S18: Ratio variations, 2.5 mL DMSO + 3.5 mL H<sub>2</sub>O

| Time, s | T <sub>1</sub> , °C | T <sub>2</sub> , °C | T <sub>3</sub> , °C | T <sub>med</sub> , °C | D(T) |
|---------|---------------------|---------------------|---------------------|-----------------------|------|
| 0       | 23.0                | 23.0                | 23.0                | 23.0                  | 0.00 |
| 10      | 30.4                | 31.1                | 30.9                | 30.8                  | 0.13 |
| 20      | 35.3                | 36.2                | 35.6                | 35.7                  | 0.21 |
| 30      | 34.3                | 32.0                | 33.6                | 33.3                  | 1.39 |
| 40      | 32.7                | 34.0                | 32.2                | 33.0                  | 0.86 |
| 50      | 31.8                | 33.3                | 31.0                | 32.0                  | 1.36 |
| 60      | 31.4                | 31.9                | 34.2                | 32.5                  | 2.23 |
| 70      | 35.6                | 36.5                | 37.9                | 36.7                  | 1.34 |
| 80      | 58.1                | 58.4                | 59.9                | 58.8                  | 0.93 |
| 90      | 62.3                | 59.3                | 60.3                | 60.6                  | 2.33 |
| 100     | 59.0                | 58.8                | 58.9                | 58.9                  | 0.01 |
| 110     | 55.7                | 55.7                | 57.5                | 56.3                  | 1.08 |
| 120     | 52.2                | 52.8                | 55.2                | 53.4                  | 2.52 |
| 130     | 49.9                | 50.0                | 53.1                | 51.0                  | 3.31 |
| 140     | 49.3                | 48.8                | 51.4                | 49.8                  | 1.90 |
| 150     | 49.5                | 49.4                | 50.0                | 49.6                  | 0.10 |
| 160     | 49.5                | 49.1                | 49.7                | 49.4                  | 0.09 |
| 170     | 49.5                | 48.7                | 49.7                | 49.3                  | 0.28 |
| 180     | 49.3                | 48.2                | 49.0                | 48.8                  | 0.32 |
| 190     | 48.8                | 48.2                | 48.4                | 48.5                  | 0.09 |
| 200     | 48.5                | 48.0                | 47.9                | 48.1                  | 0.10 |
| 210     | 48.1                | 47.6                | 47.5                | 47.7                  | 0.10 |
| 220     | 47.5                | 46.8                | 48.0                | 47.4                  | 0.36 |
| 230     | 47.3                | 46.6                | 47.6                | 47.2                  | 0.26 |

|                 |      |      |      |            |        |
|-----------------|------|------|------|------------|--------|
| 240             | 46.8 | 46.1 | 46.9 | 46.6       | 0.19   |
| 250             | 46.4 | 45.7 | 46.4 | 46.2       | 0.16   |
| 260             | 45.8 | 45.5 | 46.2 | 45.8       | 0.12   |
| 270             | 45.5 | 44.9 | 45.5 | 45.3       | 0.12   |
| 280             | 45.1 | 44.7 | 45.7 | 45.2       | 0.25   |
| 290             | 44.6 | 44.4 | 45.4 | 44.8       | 0.28   |
| 300             | 44.2 | 44.1 | 44.9 | 44.4       | 0.19   |
| 310             | 43.8 | 43.5 | 44.7 | 44.0       | 0.39   |
| 320             | 43.4 | 43.3 | 44.2 | 43.6       | 0.24   |
| 330             | 43.0 | 42.8 | 43.7 | 43.2       | 0.22   |
| 340             | 42.7 | 42.5 | 43.4 | 42.9       | 0.22   |
| 350             | 42.6 | 42.4 | 43.0 | 42.7       | 0.09   |
| 360             | 42.1 | 41.9 | 43.0 | 42.3       | 0.34   |
| 370             | 41.8 | 41.5 | 42.5 | 41.9       | 0.26   |
| 380             | 41.5 | 41.1 | 42.3 | 41.6       | 0.37   |
| 390             | 41.1 | 40.8 | 41.8 | 41.2       | 0.26   |
| 400             | 40.9 | 40.5 | 41.5 | 41.0       | 0.25   |
| 410             | 40.8 | 40.3 | 41.1 | 40.7       | 0.16   |
| 420             | 40.3 | 39.9 | 40.7 | 40.3       | 0.16   |
| 430             | 40.3 | 39.3 | 41.0 | 40.2       | 0.73   |
| 440             | 39.9 | 39.4 | 40.7 | 40.0       | 0.43   |
| 450             | 39.4 | 39.1 | 40.5 | 39.7       | 0.54   |
| 460             | 39.1 | 38.8 | 40.3 | 39.4       | 0.63   |
| 470             | 38.9 | 38.6 | 39.8 | 39.1       | 0.39   |
| 480             | 38.8 | 38.3 | 39.5 | 38.9       | 0.36   |
| 490             | 38.5 | 38.0 | 39.1 | 38.5       | 0.30   |
| 500             | 38.3 | 38.0 | 38.8 | 38.4       | 0.16   |
| 510             | 38.2 | 37.6 | 39.0 | 38.3       | 0.49   |
| 520             | 37.6 | 37.4 | 38.7 | 37.9       | 0.49   |
| 530             | 37.5 | 37.3 | 38.5 | 37.8       | 0.41   |
| 540             | 37.3 | 37.0 | 38.2 | 37.5       | 0.39   |
| 550             | 37.2 | 36.7 | 38.1 | 37.3       | 0.50   |
| 560             | 36.9 | 36.6 | 37.8 | 37.1       | 0.39   |
| 570             | 36.7 | 36.4 | 37.5 | 36.9       | 0.32   |
| Sample variance |      |      |      |            | 0.56   |
|                 |      |      |      | max D(T) = | 3.31   |
|                 |      |      |      | min D(T) = | 0      |
|                 |      |      |      | G=         | 0.1028 |
|                 |      |      |      | Sum D(T)=  | 32.21  |
|                 |      |      |      | G known=   | 0.1131 |

Table S19: Ratio variations, 3 mL DMSO + 3 mL H<sub>2</sub>O

| 3 mL DMSO + 3 mL H <sub>2</sub> O |                     |                     |                     |                       |      |
|-----------------------------------|---------------------|---------------------|---------------------|-----------------------|------|
| Time, s                           | T <sub>1</sub> , °C | T <sub>2</sub> , °C | T <sub>3</sub> , °C | T <sub>med</sub> , °C | D(T) |

|     |      |      |      |      |      |
|-----|------|------|------|------|------|
| 0   | 23.0 | 23.0 | 23.0 | 23.0 | 0.00 |
| 10  | 28.9 | 29.6 | 29.0 | 29.2 | 0.14 |
| 20  | 27.5 | 27.4 | 28.6 | 27.8 | 0.44 |
| 30  | 36.0 | 40.1 | 37.3 | 37.8 | 4.39 |
| 40  | 34.7 | 37.6 | 37.7 | 36.7 | 2.90 |
| 50  | 31.8 | 36.1 | 35.2 | 34.4 | 5.14 |
| 60  | 30.8 | 33.9 | 33.3 | 32.7 | 2.70 |
| 70  | 41.3 | 42.8 | 40.1 | 41.4 | 1.83 |
| 80  | 50.3 | 50.7 | 54.3 | 51.8 | 4.85 |
| 90  | 55.4 | 55.5 | 56.4 | 55.8 | 0.30 |
| 100 | 58.8 | 58.8 | 58.4 | 58.7 | 0.05 |
| 110 | 60.0 | 58.8 | 57.4 | 58.7 | 1.69 |
| 120 | 56.9 | 57.6 | 54.5 | 56.3 | 2.64 |
| 130 | 53.8 | 56.2 | 53.3 | 54.4 | 2.40 |
| 140 | 51.3 | 54.7 | 51.5 | 52.5 | 3.64 |
| 150 | 49.8 | 53.1 | 51.7 | 51.5 | 2.74 |
| 160 | 49.9 | 51.2 | 51.2 | 50.8 | 0.56 |
| 170 | 49.5 | 50.6 | 51.1 | 50.4 | 0.67 |
| 180 | 49.5 | 50.8 | 51.2 | 50.5 | 0.79 |
| 190 | 47.9 | 50.6 | 51.2 | 49.9 | 3.09 |
| 200 | 47.6 | 50.2 | 50.3 | 49.4 | 2.34 |
| 210 | 48.4 | 49.9 | 50.1 | 49.5 | 0.86 |
| 220 | 48.2 | 49.4 | 49.7 | 49.1 | 0.63 |
| 230 | 47.8 | 49.3 | 49.2 | 48.8 | 0.70 |
| 240 | 47.0 | 48.8 | 48.8 | 48.2 | 1.08 |
| 250 | 46.9 | 48.7 | 48.3 | 48.0 | 0.89 |
| 260 | 46.8 | 48.3 | 47.8 | 47.6 | 0.58 |
| 270 | 46.0 | 47.7 | 47.3 | 47.0 | 0.79 |
| 280 | 46.6 | 47.2 | 46.9 | 46.9 | 0.09 |
| 290 | 44.8 | 46.8 | 46.9 | 46.2 | 1.40 |
| 300 | 44.8 | 46.2 | 46.2 | 45.7 | 0.65 |
| 310 | 44.7 | 46.0 | 45.5 | 45.4 | 0.43 |
| 320 | 44.0 | 45.8 | 45.1 | 45.0 | 0.82 |
| 330 | 44.5 | 45.2 | 44.7 | 44.8 | 0.13 |
| 340 | 43.7 | 44.6 | 44.4 | 44.2 | 0.22 |
| 350 | 43.5 | 44.1 | 44.3 | 44.0 | 0.17 |
| 360 | 43.5 | 43.9 | 43.8 | 43.7 | 0.04 |
| 370 | 43.0 | 43.6 | 43.5 | 43.4 | 0.10 |
| 380 | 42.8 | 43.1 | 42.7 | 42.9 | 0.04 |
| 390 | 42.3 | 42.8 | 42.6 | 42.6 | 0.06 |
| 400 | 42.2 | 42.4 | 42.3 | 42.3 | 0.01 |
| 410 | 41.8 | 42.0 | 42.0 | 41.9 | 0.01 |
| 420 | 42.0 | 41.6 | 41.5 | 41.7 | 0.07 |
| 430 | 41.9 | 41.3 | 41.2 | 41.5 | 0.14 |
| 440 | 41.0 | 40.9 | 40.6 | 40.8 | 0.04 |

|                 |      |      |      |      |            |
|-----------------|------|------|------|------|------------|
| 450             | 40.7 | 40.7 | 40.4 | 40.6 | 0.03       |
| 460             | 40.5 | 40.3 | 40.0 | 40.3 | 0.06       |
| 470             | 40.2 | 39.9 | 39.4 | 39.8 | 0.16       |
| 480             | 40.2 | 39.9 | 39.1 | 39.7 | 0.32       |
| 490             | 39.4 | 39.4 | 38.9 | 39.2 | 0.08       |
| 500             | 39.3 | 39.2 | 38.5 | 39.0 | 0.19       |
| 510             | 39.0 | 38.8 | 38.5 | 38.8 | 0.06       |
| 520             | 38.7 | 38.8 | 38.0 | 38.5 | 0.19       |
| 530             | 38.8 | 38.3 | 37.9 | 38.3 | 0.20       |
| 540             | 38.3 | 38.1 | 37.6 | 38.0 | 0.13       |
| 550             | 38.4 | 37.9 | 37.3 | 37.9 | 0.30       |
| 560             | 38.4 | 37.6 | 37.0 | 37.7 | 0.49       |
| 570             | 37.1 | 37.4 | 36.8 | 37.1 | 0.09       |
| 580             | 37.0 | 37.1 | 36.6 | 36.9 | 0.07       |
| 590             | 36.6 | 37.1 | 36.3 | 36.7 | 0.16       |
| 600             | 36.5 | 37.1 | 36.3 | 36.6 | 0.17       |
| Sample variance |      |      |      |      | 0.92       |
|                 |      |      |      |      | max D(T) = |
|                 |      |      |      |      | 5.14       |
|                 |      |      |      |      | min D(T) = |
|                 |      |      |      |      | 0          |
|                 |      |      |      |      | G=         |
|                 |      |      |      |      | 0.0917     |
|                 |      |      |      |      | Sum D(T)=  |
|                 |      |      |      |      | 56.08      |
|                 |      |      |      |      | G known=   |
|                 |      |      |      |      | 0.1131     |

Table S20: Ratio variations, 3.5 mL DMSO + 2.5 mL H<sub>2</sub>O

| 3.5 mL DMSO + 2.5 mL H <sub>2</sub> O |                     |                     |                     |                       |      |
|---------------------------------------|---------------------|---------------------|---------------------|-----------------------|------|
| Time, s                               | T <sub>1</sub> , °C | T <sub>2</sub> , °C | T <sub>3</sub> , °C | T <sub>med</sub> , °C | D(T) |
| 0                                     | 23.0                | 23.0                | 23.0                | 23.0                  | 0.00 |
| 10                                    | 29.4                | 29.6                | 29.4                | 29.5                  | 0.01 |
| 20                                    | 33.3                | 33.4                | 33.3                | 33.3                  | 0.00 |
| 30                                    | 33.3                | 34.1                | 32.3                | 33.2                  | 0.81 |
| 40                                    | 33.1                | 33.5                | 34.9                | 33.8                  | 0.89 |
| 50                                    | 36.8                | 36.6                | 37.5                | 37.0                  | 0.22 |
| 60                                    | 43.9                | 43.3                | 43.5                | 43.6                  | 0.09 |
| 70                                    | 46.5                | 45.9                | 47.9                | 46.8                  | 1.05 |
| 80                                    | 49.2                | 49.7                | 50.6                | 49.8                  | 0.50 |
| 90                                    | 50.4                | 50.6                | 50.9                | 50.6                  | 0.06 |
| 100                                   | 50.8                | 51.1                | 51.7                | 51.2                  | 0.21 |
| 110                                   | 51.1                | 51.5                | 52.2                | 51.6                  | 0.31 |
| 120                                   | 51.5                | 51.9                | 52.2                | 51.9                  | 0.12 |
| 130                                   | 51.3                | 51.9                | 52.8                | 52.0                  | 0.57 |
| 140                                   | 51.4                | 52.1                | 52.4                | 52.0                  | 0.26 |
| 150                                   | 51.4                | 52.0                | 52.4                | 51.9                  | 0.25 |
| 160                                   | 51.4                | 51.9                | 52.0                | 51.8                  | 0.10 |
| 170                                   | 51.5                | 51.6                | 51.9                | 51.7                  | 0.04 |

|                 |      |      |      |            |        |
|-----------------|------|------|------|------------|--------|
| 180             | 51.3 | 51.6 | 51.6 | 51.5       | 0.03   |
| 190             | 51.2 | 51.1 | 51.2 | 51.2       | 0.00   |
| 200             | 50.7 | 51.0 | 51.1 | 50.9       | 0.04   |
| 210             | 49.8 | 50.6 | 50.6 | 50.3       | 0.21   |
| 220             | 49.8 | 50.2 | 50.1 | 50.0       | 0.04   |
| 230             | 49.5 | 49.8 | 49.8 | 49.7       | 0.03   |
| 240             | 48.7 | 49.5 | 49.3 | 49.2       | 0.17   |
| 250             | 48.7 | 49.2 | 48.9 | 48.9       | 0.06   |
| 260             | 47.9 | 48.7 | 48.4 | 48.3       | 0.16   |
| 270             | 47.6 | 48.2 | 48.2 | 48.0       | 0.12   |
| 280             | 47.3 | 47.6 | 47.4 | 47.4       | 0.02   |
| 290             | 46.5 | 47.2 | 47.0 | 46.9       | 0.13   |
| 300             | 46.2 | 46.7 | 46.5 | 46.5       | 0.06   |
| 310             | 45.8 | 46.2 | 46.2 | 46.1       | 0.05   |
| 320             | 45.3 | 45.8 | 45.7 | 45.6       | 0.07   |
| 330             | 45.1 | 45.5 | 45.3 | 45.3       | 0.04   |
| 340             | 44.5 | 45.0 | 44.9 | 44.8       | 0.07   |
| 350             | 44.0 | 44.7 | 44.5 | 44.4       | 0.13   |
| 360             | 43.7 | 44.2 | 44.1 | 44.0       | 0.07   |
| 370             | 43.7 | 43.7 | 43.9 | 43.8       | 0.01   |
| 380             | 43.1 | 43.4 | 43.1 | 43.2       | 0.03   |
| 390             | 42.7 | 43.0 | 43.0 | 42.9       | 0.03   |
| 400             | 42.2 | 42.9 | 42.4 | 42.5       | 0.13   |
| 410             | 41.9 | 42.5 | 41.9 | 42.1       | 0.12   |
| 420             | 41.4 | 42.3 | 41.6 | 41.8       | 0.22   |
| 430             | 41.2 | 41.7 | 41.4 | 41.4       | 0.06   |
| 440             | 41.1 | 41.6 | 40.9 | 41.2       | 0.13   |
| 450             | 40.5 | 41.5 | 40.6 | 40.9       | 0.30   |
| 460             | 40.3 | 41.1 | 40.5 | 40.6       | 0.17   |
| 470             | 39.8 | 40.7 | 40.0 | 40.2       | 0.22   |
| 480             | 39.5 | 40.1 | 39.5 | 39.7       | 0.12   |
| 490             | 39.1 | 39.8 | 39.3 | 39.4       | 0.13   |
| 500             | 39.1 | 39.6 | 39.0 | 39.2       | 0.10   |
| 510             | 38.8 | 39.1 | 38.6 | 38.8       | 0.06   |
| 520             | 38.5 | 38.9 | 38.3 | 38.6       | 0.09   |
| 530             | 38.5 | 38.4 | 38.0 | 38.3       | 0.07   |
| 540             | 38.8 | 38.2 | 37.8 | 38.3       | 0.25   |
| 550             | 38.5 | 37.9 | 37.7 | 38.0       | 0.17   |
| Sample variance |      |      |      |            | 0.17   |
|                 |      |      |      | max D(T) = | 1.05   |
|                 |      |      |      | min D(T) = | 0      |
|                 |      |      |      | G=         | 0.1107 |
|                 |      |      |      | Sum D(T)=  | 9.52   |
|                 |      |      |      | G known=   | 0.1131 |

Table S21: Ratio variations, 4.5 mL DMSO + 1.5 mL H<sub>2</sub>O

| 4.5 mL DMSO + 1.5 mL H <sub>2</sub> O |                     |                     |                     |                       |      |
|---------------------------------------|---------------------|---------------------|---------------------|-----------------------|------|
| Time, s                               | T <sub>1</sub> , °C | T <sub>2</sub> , °C | T <sub>3</sub> , °C | T <sub>med</sub> , °C | D(T) |
| 0                                     | 23.0                | 23.0                | 23.0                | 23.0                  | 0.00 |
| 10                                    | 28.2                | 28.8                | 29.6                | 28.9                  | 0.49 |
| 20                                    | 34.9                | 34.6                | 33.4                | 34.3                  | 0.63 |
| 30                                    | 35.7                | 34.8                | 35.4                | 35.3                  | 0.21 |
| 40                                    | 33.0                | 33.5                | 34.4                | 33.6                  | 0.50 |
| 50                                    | 39.0                | 38.4                | 37.9                | 38.4                  | 0.30 |
| 60                                    | 40.8                | 40.1                | 40.2                | 40.4                  | 0.14 |
| 70                                    | 41.7                | 41.0                | 41.1                | 41.3                  | 0.14 |
| 80                                    | 42.2                | 41.8                | 42.3                | 42.1                  | 0.07 |
| 90                                    | 42.9                | 42.4                | 43.2                | 42.8                  | 0.16 |
| 100                                   | 43.7                | 43.1                | 43.9                | 43.6                  | 0.17 |
| 110                                   | 44.4                | 44.1                | 44.9                | 44.5                  | 0.16 |
| 120                                   | 44.9                | 44.5                | 45.6                | 45.0                  | 0.31 |
| 130                                   | 45.5                | 45.3                | 46.3                | 45.7                  | 0.28 |
| 140                                   | 45.9                | 45.7                | 47.2                | 46.3                  | 0.66 |
| 150                                   | 46.4                | 45.8                | 47.7                | 46.6                  | 0.94 |
| 160                                   | 46.6                | 46.2                | 47.9                | 46.9                  | 0.79 |
| 170                                   | 47.1                | 46.8                | 48.5                | 47.5                  | 0.82 |
| 180                                   | 47.0                | 46.8                | 48.6                | 47.5                  | 0.97 |
| 190                                   | 47.4                | 47.0                | 49.0                | 47.8                  | 1.12 |
| 200                                   | 47.7                | 47.4                | 49.2                | 48.1                  | 0.93 |
| 210                                   | 47.5                | 47.1                | 49.1                | 47.9                  | 1.12 |
| 220                                   | 47.5                | 47.1                | 49.0                | 47.9                  | 1.00 |
| 230                                   | 47.5                | 47.2                | 49.1                | 47.9                  | 1.04 |
| 240                                   | 47.4                | 47.1                | 48.9                | 47.8                  | 0.93 |
| 250                                   | 47.5                | 47.2                | 48.7                | 47.8                  | 0.63 |
| 260                                   | 47.3                | 46.9                | 48.7                | 47.6                  | 0.89 |
| 270                                   | 47.1                | 46.9                | 48.8                | 47.6                  | 1.09 |
| 280                                   | 46.9                | 46.6                | 48.5                | 47.3                  | 1.04 |
| 290                                   | 46.8                | 46.8                | 48.3                | 47.3                  | 0.75 |
| 300                                   | 46.6                | 46.5                | 47.8                | 47.0                  | 0.52 |
| 310                                   | 46.5                | 46.3                | 47.4                | 46.7                  | 0.34 |
| 320                                   | 46.3                | 46.0                | 47.2                | 46.5                  | 0.39 |
| 330                                   | 45.9                | 45.6                | 46.9                | 46.1                  | 0.46 |
| 340                                   | 45.8                | 45.3                | 46.4                | 45.8                  | 0.30 |
| 350                                   | 45.6                | 45.3                | 46.0                | 45.6                  | 0.12 |
| 360                                   | 45.1                | 44.8                | 45.9                | 45.3                  | 0.32 |
| 370                                   | 44.2                | 44.5                | 45.4                | 44.7                  | 0.39 |
| 380                                   | 44.1                | 44.2                | 45.0                | 44.4                  | 0.24 |
| 390                                   | 43.8                | 44.0                | 44.5                | 44.1                  | 0.13 |
| 400                                   | 43.5                | 43.8                | 44.4                | 43.9                  | 0.21 |
| 410                                   | 43.0                | 43.5                | 44.2                | 43.6                  | 0.36 |

|                 |      |      |      |            |        |
|-----------------|------|------|------|------------|--------|
| 420             | 42.8 | 43.2 | 43.6 | 43.2       | 0.16   |
| 430             | 42.7 | 43.0 | 43.1 | 42.9       | 0.04   |
| 440             | 42.3 | 42.8 | 42.8 | 42.6       | 0.08   |
| 450             | 42.2 | 42.3 | 42.6 | 42.4       | 0.04   |
| 460             | 41.9 | 41.9 | 42.2 | 42.0       | 0.03   |
| 470             | 41.6 | 41.7 | 41.9 | 41.7       | 0.02   |
| 480             | 41.2 | 41.6 | 41.5 | 41.4       | 0.04   |
| 490             | 40.8 | 41.1 | 41.3 | 41.1       | 0.06   |
| 500             | 40.8 | 41.0 | 40.8 | 40.9       | 0.01   |
| 510             | 40.4 | 40.6 | 40.5 | 40.5       | 0.01   |
| 520             | 40.0 | 40.3 | 40.0 | 40.1       | 0.03   |
| 530             | 39.8 | 39.8 | 39.6 | 39.7       | 0.01   |
| 540             | 39.6 | 39.5 | 39.3 | 39.5       | 0.02   |
| 550             | 39.5 | 39.2 | 39.2 | 39.3       | 0.03   |
| 560             | 39.2 | 38.8 | 38.9 | 39.0       | 0.04   |
| 570             | 39.2 | 38.7 | 38.5 | 38.8       | 0.13   |
| 580             | 39.5 | 38.7 | 38.6 | 38.9       | 0.24   |
| 590             | 39.2 | 38.5 | 37.9 | 38.5       | 0.42   |
| Sample variance |      |      |      |            | 0.39   |
|                 |      |      |      | max D(T) = | 1.12   |
|                 |      |      |      | min D(T) = | 0      |
|                 |      |      |      | G=         | 0.0475 |
|                 |      |      |      | Sum D(T)=  | 23.59  |
|                 |      |      |      | G known=   | 0.1131 |

Table S22: Ratio variations, 5 mL DMSO + 1 mL H<sub>2</sub>O

| 5 mL DMSO + 1 mL H <sub>2</sub> O |                     |                     |                     |                       |      |
|-----------------------------------|---------------------|---------------------|---------------------|-----------------------|------|
| Time, s                           | T <sub>1</sub> , °C | T <sub>2</sub> , °C | T <sub>3</sub> , °C | T <sub>med</sub> , °C | D(T) |
| 0                                 | 23.0                | 23.0                | 23.0                | 23.0                  | 0.00 |
| 10                                | 27.5                | 23.3                | 28.7                | 26.5                  | 8.04 |
| 20                                | 26.8                | 23.2                | 23.4                | 24.5                  | 4.09 |
| 30                                | 27.7                | 26.2                | 27.7                | 27.2                  | 0.75 |
| 40                                | 31.4                | 26.1                | 29.4                | 29.0                  | 7.16 |
| 50                                | 29.5                | 31.7                | 33.0                | 31.4                  | 3.13 |
| 60                                | 32.4                | 31.1                | 32.1                | 31.9                  | 0.46 |
| 70                                | 35.8                | 34.6                | 33.3                | 34.6                  | 1.56 |
| 80                                | 36.4                | 35.2                | 34.5                | 35.4                  | 0.92 |
| 90                                | 37.0                | 35.7                | 34.7                | 35.8                  | 1.33 |
| 100                               | 37.7                | 36.2                | 35.1                | 36.3                  | 1.70 |
| 110                               | 38.3                | 36.8                | 35.6                | 36.9                  | 1.83 |
| 120                               | 38.6                | 37.5                | 36.2                | 37.4                  | 1.44 |
| 130                               | 39.1                | 37.9                | 36.6                | 37.9                  | 1.56 |
| 140                               | 39.4                | 38.0                | 37.1                | 38.2                  | 1.34 |
| 150                               | 40.1                | 38.4                | 37.5                | 38.7                  | 1.74 |



|     |      |      |      |      |      |
|-----|------|------|------|------|------|
| 160 | 40.4 | 38.8 | 37.6 | 38.9 | 1.97 |
| 170 | 40.5 | 39.1 | 37.9 | 39.2 | 1.69 |
| 180 | 40.8 | 39.1 | 38.3 | 39.4 | 1.63 |
| 190 | 40.9 | 39.4 | 38.4 | 39.6 | 1.58 |
| 200 | 41.3 | 40.0 | 38.6 | 40.0 | 1.82 |
| 210 | 41.5 | 39.7 | 38.9 | 40.0 | 1.77 |
| 220 | 41.7 | 40.0 | 38.9 | 40.2 | 1.99 |
| 230 | 41.8 | 39.8 | 39.0 | 40.2 | 2.08 |
| 240 | 42.0 | 40.3 | 39.2 | 40.5 | 1.99 |
| 250 | 42.0 | 40.1 | 39.2 | 40.4 | 2.04 |
| 260 | 42.0 | 40.3 | 39.4 | 40.6 | 1.74 |
| 270 | 41.9 | 40.2 | 39.2 | 40.4 | 1.86 |
| 280 | 41.8 | 40.3 | 39.3 | 40.5 | 1.58 |
| 290 | 41.6 | 40.3 | 39.4 | 40.4 | 1.22 |
| 300 | 41.6 | 40.6 | 39.5 | 40.6 | 1.10 |
| 310 | 41.6 | 40.5 | 39.8 | 40.6 | 0.82 |
| 320 | 41.8 | 40.3 | 39.4 | 40.5 | 1.47 |
| 330 | 41.6 | 40.6 | 39.6 | 40.6 | 1.00 |
| 340 | 41.5 | 40.5 | 39.7 | 40.6 | 0.81 |
| 350 | 41.8 | 40.5 | 39.5 | 40.6 | 1.33 |
| 360 | 41.5 | 40.7 | 39.7 | 40.6 | 0.81 |
| 370 | 41.4 | 40.2 | 39.5 | 40.4 | 0.92 |
| 380 | 41.2 | 40.4 | 39.3 | 40.3 | 0.91 |
| 390 | 41.1 | 40.1 | 39.1 | 40.1 | 1.00 |
| 400 | 40.8 | 40.2 | 39.1 | 40.0 | 0.74 |
| 410 | 40.8 | 40.2 | 38.9 | 40.0 | 0.94 |
| 420 | 40.9 | 40.0 | 38.9 | 39.9 | 1.00 |
| 430 | 40.8 | 39.7 | 38.9 | 39.8 | 0.91 |
| 440 | 40.9 | 39.6 | 39.0 | 39.8 | 0.94 |
| 450 | 40.5 | 39.4 | 38.8 | 39.6 | 0.74 |
| 460 | 40.6 | 39.6 | 38.8 | 39.7 | 0.81 |
| 470 | 40.1 | 39.4 | 38.7 | 39.4 | 0.49 |
| 480 | 40.3 | 39.3 | 38.7 | 39.4 | 0.65 |
| 490 | 40.0 | 39.1 | 38.4 | 39.2 | 0.64 |
| 500 | 39.9 | 38.8 | 38.4 | 39.0 | 0.60 |
| 510 | 39.6 | 38.9 | 38.2 | 38.9 | 0.49 |
| 520 | 39.4 | 38.9 | 38.1 | 38.8 | 0.43 |
| 530 | 39.5 | 38.6 | 37.8 | 38.6 | 0.72 |
| 540 | 39.1 | 38.6 | 37.8 | 38.5 | 0.43 |
| 550 | 39.2 | 38.3 | 37.7 | 38.4 | 0.57 |
| 560 | 39.2 | 38.4 | 37.6 | 38.4 | 0.64 |
| 570 | 38.9 | 38.1 | 37.4 | 38.1 | 0.56 |
| 580 | 38.7 | 38.0 | 37.3 | 38.0 | 0.49 |
| 590 | 38.6 | 37.8 | 37.1 | 37.8 | 0.56 |
| 600 | 38.3 | 37.6 | 36.8 | 37.6 | 0.56 |

|                 |            |        |
|-----------------|------------|--------|
| Sample variance |            | 1.41   |
|                 | max D(T) = | 8.04   |
|                 | min D(T) = | 0      |
|                 | G=         | 0.0933 |
|                 | Sum D(T)=  | 86.22  |
|                 | G known=   | 0.1131 |

Table S23: Ratio variations, 5.5 mL DMSO + 0.5 mL H<sub>2</sub>O

| 5.5 mL DMSO + 0.5 mL H <sub>2</sub> O |                     |                     |                     |                       |      |
|---------------------------------------|---------------------|---------------------|---------------------|-----------------------|------|
| Time, s                               | T <sub>1</sub> , °C | T <sub>2</sub> , °C | T <sub>3</sub> , °C | T <sub>med</sub> , °C | D(T) |
| 0                                     | 23.0                | 23.0                | 23.0                | 23.0                  | 0.00 |
| 10                                    | 30.6                | 29.3                | 30.2                | 30.0                  | 0.44 |
| 20                                    | 36.1                | 35.3                | 36.4                | 35.9                  | 0.32 |
| 30                                    | 34.9                | 35.0                | 36.0                | 35.3                  | 0.37 |
| 40                                    | 33.1                | 34.0                | 34.4                | 33.8                  | 0.44 |
| 50                                    | 30.6                | 30.8                | 31.6                | 31.0                  | 0.28 |
| 60                                    | 29.8                | 30.2                | 30.7                | 30.2                  | 0.20 |
| 70                                    | 29.9                | 29.5                | 29.8                | 29.7                  | 0.04 |
| 80                                    | 29.8                | 29.9                | 29.6                | 29.8                  | 0.02 |
| 90                                    | 30.0                | 29.8                | 29.9                | 29.9                  | 0.01 |
| 100                                   | 30.0                | 30.2                | 30.1                | 30.1                  | 0.01 |
| 110                                   | 30.1                | 30.3                | 30.2                | 30.2                  | 0.01 |
| 120                                   | 30.2                | 30.5                | 30.3                | 30.3                  | 0.02 |
| 130                                   | 30.6                | 30.6                | 30.6                | 30.6                  | 0.00 |
| 140                                   | 30.6                | 30.7                | 30.3                | 30.5                  | 0.04 |
| 150                                   | 30.7                | 30.9                | 30.4                | 30.7                  | 0.06 |
| 160                                   | 30.7                | 30.9                | 30.5                | 30.7                  | 0.04 |
| 170                                   | 31.3                | 31.1                | 30.9                | 31.1                  | 0.04 |
| 180                                   | 31.1                | 31.2                | 31.0                | 31.1                  | 0.01 |
| 190                                   | 31.3                | 31.4                | 31.0                | 31.2                  | 0.04 |
| 200                                   | 31.2                | 31.5                | 31.2                | 31.3                  | 0.03 |
| 210                                   | 31.4                | 31.5                | 31.3                | 31.4                  | 0.01 |
| 220                                   | 31.4                | 31.6                | 31.1                | 31.4                  | 0.06 |
| 230                                   | 31.4                | 31.5                | 31.3                | 31.4                  | 0.01 |
| 240                                   | 31.5                | 31.6                | 31.3                | 31.5                  | 0.02 |
| 250                                   | 31.5                | 31.7                | 31.5                | 31.6                  | 0.01 |
| 260                                   | 31.8                | 31.4                | 31.4                | 31.5                  | 0.05 |
| 270                                   | 31.8                | 31.6                | 31.5                | 31.6                  | 0.02 |
| 280                                   | 31.8                | 32.1                | 31.6                | 31.8                  | 0.06 |
| 290                                   | 31.6                | 32.1                | 31.7                | 31.8                  | 0.07 |
| 300                                   | 31.6                | 32.3                | 31.7                | 31.9                  | 0.14 |
| 310                                   | 31.5                | 32.1                | 31.8                | 31.8                  | 0.09 |
| 320                                   | 31.6                | 32.2                | 31.9                | 31.9                  | 0.09 |
| 330                                   | 31.6                | 32.1                | 31.9                | 31.9                  | 0.06 |

|                 |      |      |      |      |                 |
|-----------------|------|------|------|------|-----------------|
| 340             | 32.6 | 32.2 | 32.1 | 32.3 | 0.07            |
| 350             | 32.8 | 32.3 | 31.9 | 32.3 | 0.20            |
| 360             | 33.2 | 32.3 | 32.1 | 32.5 | 0.34            |
| 370             | 33.1 | 32.2 | 32.1 | 32.5 | 0.30            |
| 380             | 33.3 | 32.3 | 32.1 | 32.6 | 0.41            |
| 390             | 33.4 | 32.4 | 32.1 | 32.6 | 0.46            |
| 400             | 33.5 | 32.4 | 32.0 | 32.6 | 0.60            |
| 410             | 33.6 | 32.4 | 32.0 | 32.7 | 0.69            |
| 420             | 33.4 | 32.5 | 32.2 | 32.7 | 0.39            |
| 430             | 33.4 | 32.0 | 32.1 | 32.5 | 0.61            |
| 440             | 33.7 | 32.1 | 32.1 | 32.6 | 0.85            |
| 450             | 33.4 | 32.1 | 32.0 | 32.5 | 0.61            |
| 460             | 33.6 | 32.1 | 32.1 | 32.6 | 0.75            |
| 470             | 33.7 | 32.2 | 32.0 | 32.6 | 0.86            |
| 480             | 33.4 | 32.0 | 32.1 | 32.5 | 0.61            |
| 490             | 33.4 | 32.0 | 32.1 | 32.5 | 0.61            |
| 500             | 33.6 | 32.0 | 32.0 | 32.5 | 0.85            |
| 510             | 33.5 | 32.1 | 32.1 | 32.6 | 0.65            |
| 520             | 33.4 | 32.2 | 32.0 | 32.5 | 0.57            |
| 530             | 33.5 | 32.1 | 32.0 | 32.5 | 0.70            |
| 540             | 33.4 | 32.0 | 32.1 | 32.5 | 0.61            |
| 550             | 33.6 | 32.2 | 31.9 | 32.6 | 0.82            |
| 560             | 33.6 | 31.9 | 31.9 | 32.5 | 0.96            |
| 570             | 33.7 | 31.9 | 31.9 | 32.5 | 1.08            |
| 580             | 33.5 | 31.8 | 32.3 | 32.5 | 0.76            |
| 590             | 31.9 | 31.8 | 31.9 | 31.9 | 0.00            |
| Sample variance |      |      |      |      | 0.31            |
|                 |      |      |      |      | max D(T) = 1.08 |
|                 |      |      |      |      | min D(T) = 0    |
|                 |      |      |      |      | G= 0.0581       |
|                 |      |      |      |      | Sum D(T)= 18.59 |
|                 |      |      |      |      | G known= 0.1131 |

## 6. NMR data

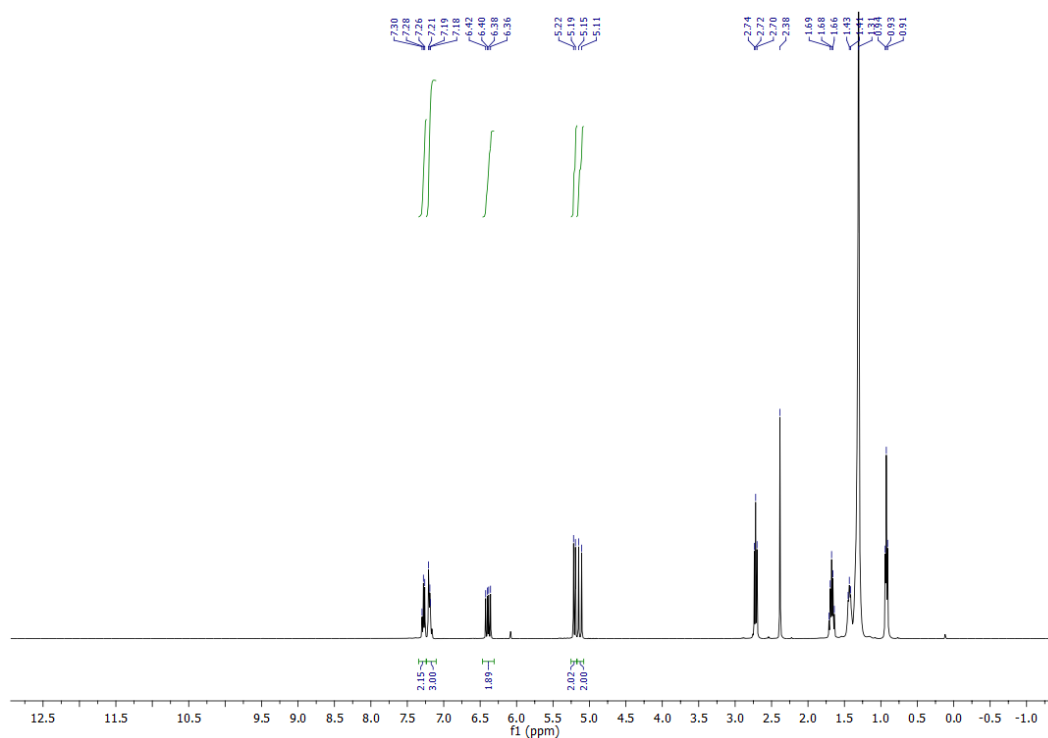

Figure S4: <sup>1</sup>H NMR spectrum of the reaction mixture after synthesis in a tube-in-tube reactor (toluene as an internal standard). The signals of toluene aromatic protons were chosen as a standard and were compared with signals of thiovinyl ether -CH=CH<sub>2</sub> protons.

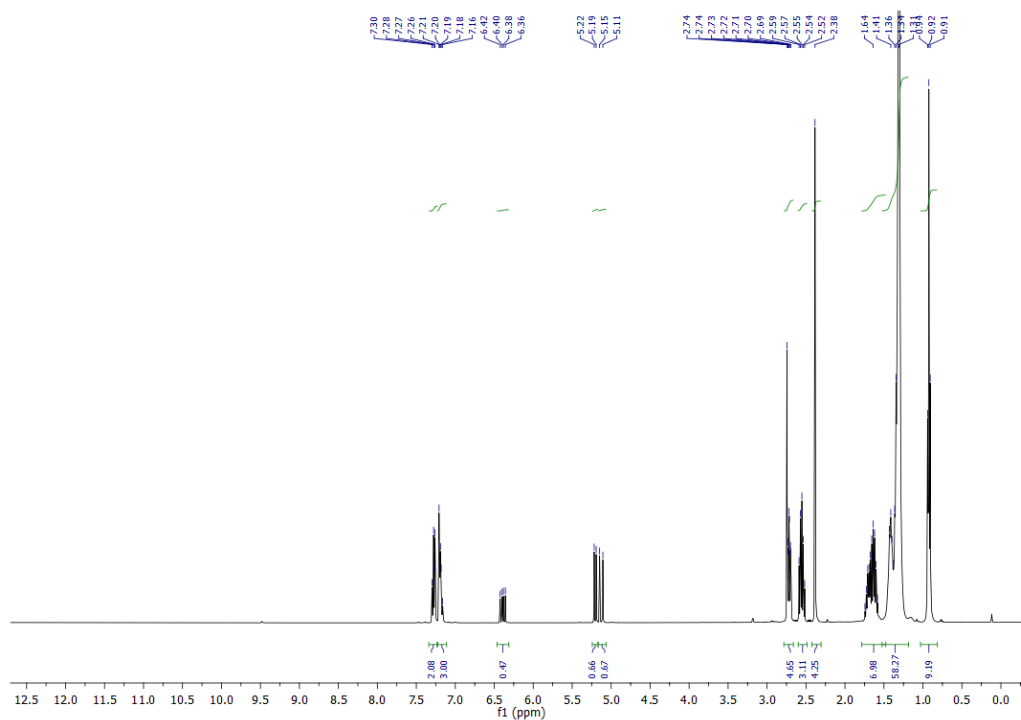

Figure S5: <sup>1</sup>H NMR spectrum of the reaction mixture after synthesis in a two-chamber reactor (toluene as an internal standard).

## 7. Reaction setup

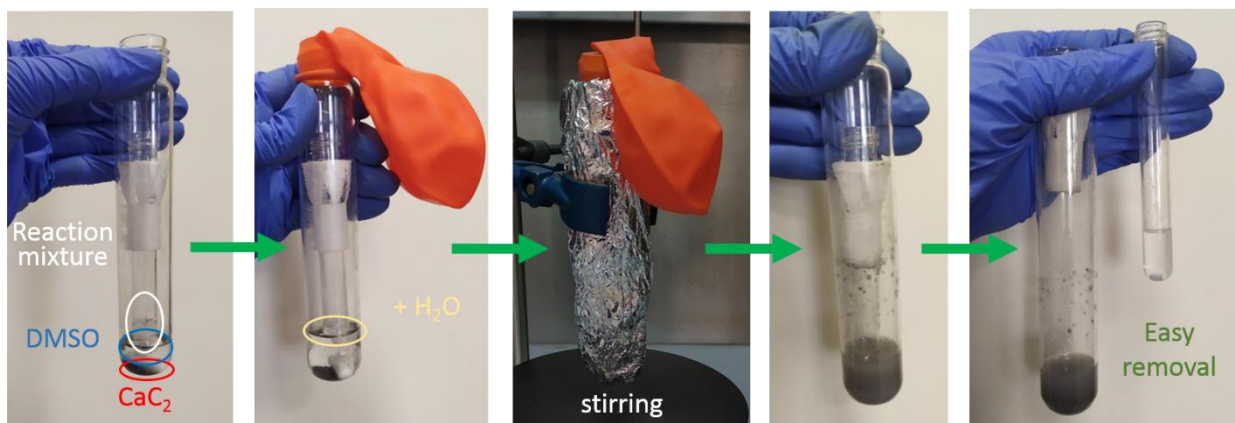

Figure S6. The thiovinilation reaction in a tube-in-tube reactor.

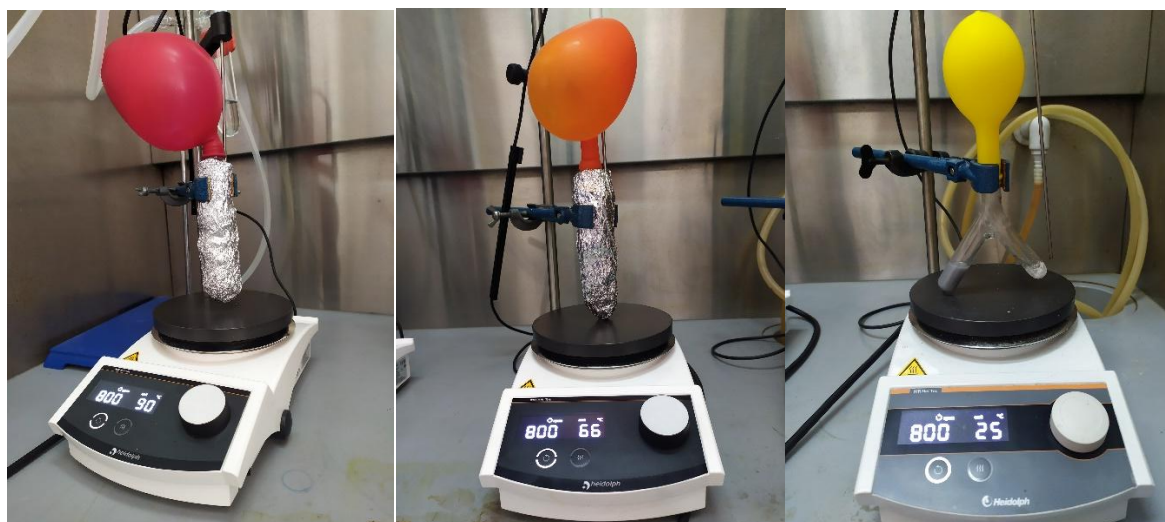

Figure S7: The reaction progress in a tube-in-tube reactor (left and centre) and in a two-chamber reactor (right).

## 8. Monitoring of the heating with a thermocouple

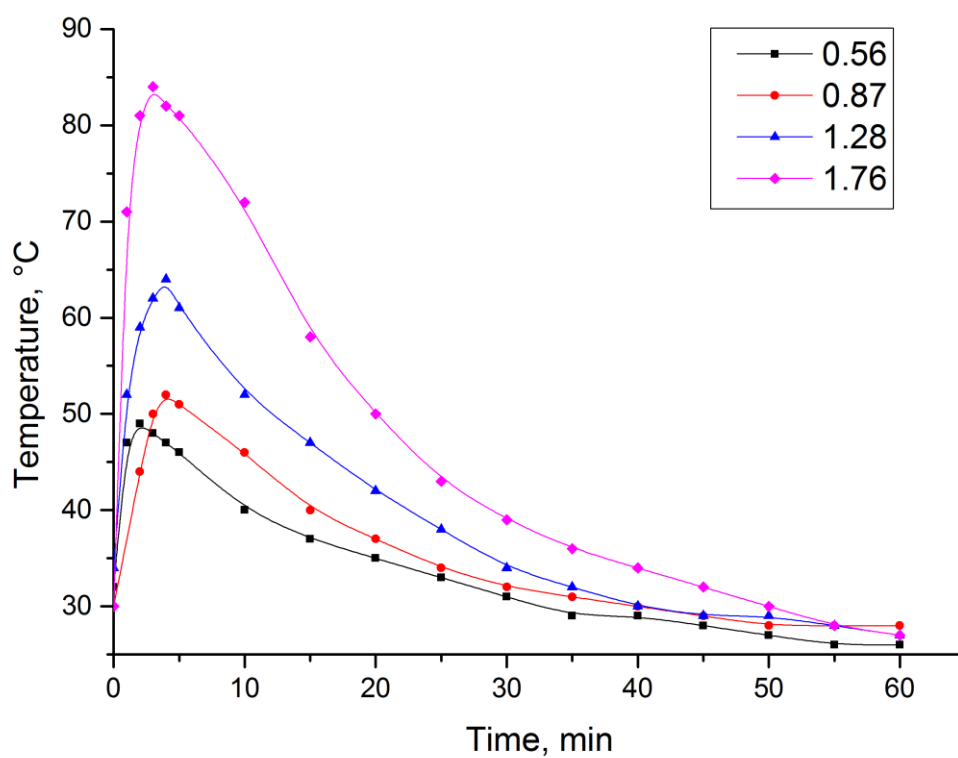

Figure S8: Temperature changes measured with a thermocouple attached to a magnetic stirred. Various loadings of carbide were used: 0.56-1.76 g of carbide.
